# Supplementary material
Source: publisher figshare collection journal article supplement (https://frontiersin.figshare.com/ndownloader/files/12548996)
Supplement: Supplementary file [file 12548996]

BLAST Results

Job title: ratA ROD

|                      |                                                         |                      |                            |
|----------------------|---------------------------------------------------------|----------------------|----------------------------|
| <b>RID</b>           | <a href="#">97FFDK6K014</a> (Expires on 02-27 14:57 pm) |                      |                            |
| <b>Query ID</b>      | Id Query_78461                                          | <b>Database Name</b> | nr                         |
| <b>Description</b>   | ratA ROD                                                | <b>Description</b>   | Nucleotide collection (nt) |
| <b>Molecule type</b> | nucleic acid                                            | <b>Program</b>       | BLASTN 2.8.0+              |
| <b>Query Length</b>  | 790                                                     |                      |                            |

Graphic Summary

Distribution of the top 100 Blast Hits on 526 subject sequences

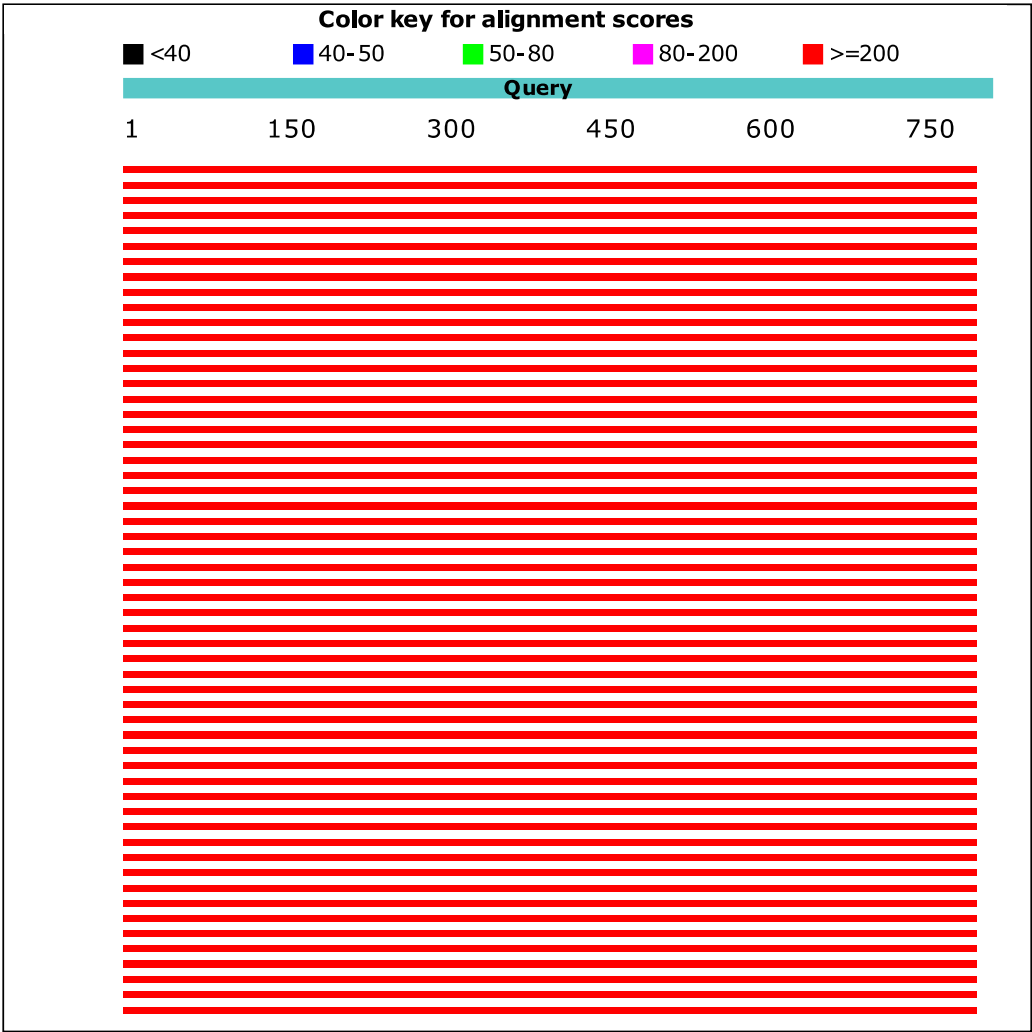

## Descriptions

Sequences producing significant alignments:

| Description                                                                                           | Max score | Total score | Query cover | E value | Ident | Accession                  |
|-------------------------------------------------------------------------------------------------------|-----------|-------------|-------------|---------|-------|----------------------------|
| Salmonella enterica strain MFDS1004839 chromosome, complete genome                                    | 1459      | 1459        | 100%        | 0.0     | 100%  | <a href="#">CP026569.1</a> |
| Salmonella enterica strain FDAARGOS_70 chromosome, complete genome                                    | 1459      | 1459        | 100%        | 0.0     | 100%  | <a href="#">CP026052.1</a> |
| Salmonella enterica subsp. enterica serovar Typhimurium strain FORC50 chromosome, complete genome     | 1459      | 1459        | 100%        | 0.0     | 100%  | <a href="#">CP019383.1</a> |
| Salmonella enterica subsp. enterica serovar Enteritidis strain SJTUF10984 chromosome, complete genome | 1459      | 1459        | 100%        | 0.0     | 100%  | <a href="#">CP015526.1</a> |
| Salmonella enterica subsp. enterica serovar Enteritidis strain SJTUF10978 chromosome, complete genome | 1459      | 1459        | 100%        | 0.0     | 100%  | <a href="#">CP015524.1</a> |
| Salmonella enterica subsp. enterica serovar Enteritidis strain 95-0621 chromosome, complete genome    | 1459      | 1459        | 100%        | 0.0     | 100%  | <a href="#">CP018661.1</a> |
| Salmonella enterica subsp. enterica serovar Enteritidis strain 93-0639 chromosome, complete genome    | 1459      | 1459        | 100%        | 0.0     | 100%  | <a href="#">CP018659.1</a> |
| Salmonella enterica subsp. enterica serovar Enteritidis strain 81-1706 chromosome, complete genome    | 1459      | 1459        | 100%        | 0.0     | 100%  | <a href="#">CP018655.1</a> |
| Salmonella enterica subsp. enterica serovar Enteritidis strain 81-1705 chromosome, complete genome    | 1459      | 1459        | 100%        | 0.0     | 100%  | <a href="#">CP018651.1</a> |
| Salmonella enterica subsp. enterica serovar Enteritidis strain 81-1607 chromosome, complete genome    | 1459      | 1459        | 100%        | 0.0     | 100%  | <a href="#">CP018648.1</a> |
| Salmonella enterica subsp. enterica serovar Enteritidis strain 81-1435, complete genome               | 1459      | 1459        | 100%        | 0.0     | 100%  | <a href="#">CP018647.1</a> |
| Salmonella enterica subsp. enterica serovar Enteritidis strain 79-2359 chromosome, complete genome    | 1459      | 1459        | 100%        | 0.0     | 100%  | <a href="#">CP018645.1</a> |
| Salmonella enterica subsp. enterica serovar Enteritidis strain 77-2980, complete genome               | 1459      | 1459        | 100%        | 0.0     | 100%  | <a href="#">CP018644.1</a> |
| Salmonella enterica subsp. enterica serovar Enteritidis strain 70-1605, complete sequence             | 1459      | 1459        | 100%        | 0.0     | 100%  | <a href="#">CP018640.1</a> |
| Salmonella enterica subsp. enterica serovar Enteritidis strain 69-3861, complete genome               | 1459      | 1459        | 100%        | 0.0     | 100%  | <a href="#">CP018637.1</a> |
| Salmonella enterica subsp. enterica serovar Enteritidis strain 56-3991, complete genome               | 1459      | 1459        | 100%        | 0.0     | 100%  | <a href="#">CP018635.1</a> |
| Salmonella enterica subsp. enterica serovar Enteritidis strain 49-2444 chromosome, complete genome    | 1459      | 1459        | 100%        | 0.0     | 100%  | <a href="#">CP018633.1</a> |
| Salmonella enterica subsp. enterica strain RM11060 chromosome, complete genome                        | 1459      | 1459        | 100%        | 0.0     | 100%  | <a href="#">CP022658.1</a> |
| Salmonella enterica strain FORC_051 chromosome, complete genome                                       | 1459      | 1459        | 100%        | 0.0     | 100%  | <a href="#">CP017232.1</a> |
| Salmonella enterica strain FORC_056 chromosome, complete genome                                       | 1459      | 1459        | 100%        | 0.0     | 100%  | <a href="#">CP017177.1</a> |
| Salmonella enterica subsp. enterica serovar Enteritidis strain FORC_052, complete genome              | 1459      | 1459        | 100%        | 0.0     | 100%  | <a href="#">CP016754.1</a> |
| Salmonella enterica subsp. enterica serovar Enteritidis strain CFSAN051873, complete                  | 1459      | 1459        | 100%        | 0.0     | 100%  | <a href="#">CP022003.1</a> |

|                                                                                                 |      |      |      |     |      |                            |
|-------------------------------------------------------------------------------------------------|------|------|------|-----|------|----------------------------|
| genome                                                                                          |      |      |      |     |      |                            |
| Salmonella enterica subsp. enterica strain CFSAN033543, complete genome                         | 1459 | 1459 | 100% | 0.0 | 100% | <a href="#">CP020825.1</a> |
| Salmonella enterica subsp. enterica strain CFSAN033541, complete genome                         | 1459 | 1459 | 100% | 0.0 | 100% | <a href="#">CP020823.1</a> |
| Salmonella enterica subsp. enterica serovar Wandsworth str. SA20092095, complete genome         | 1459 | 1459 | 100% | 0.0 | 100% | <a href="#">CP019417.1</a> |
| Salmonella enterica subsp. enterica serovar Moscow str. S-1843, complete genome                 | 1459 | 1459 | 100% | 0.0 | 100% | <a href="#">CP019415.1</a> |
| Salmonella enterica subsp. enterica serovar Blegdam str. S-1824, complete genome                | 1459 | 1459 | 100% | 0.0 | 100% | <a href="#">CP019406.1</a> |
| Salmonella enterica subsp. enterica serovar Gallinarum str. 9184, complete genome               | 1459 | 1459 | 100% | 0.0 | 100% | <a href="#">CP019035.1</a> |
| Salmonella enterica subsp. enterica serovar Newport strain 0007-33, complete genome             | 1459 | 1459 | 100% | 0.0 | 100% | <a href="#">CP013685.1</a> |
| Salmonella enterica subsp. enterica serovar Newport strain CFSAN003890, complete genome         | 1459 | 1459 | 100% | 0.0 | 100% | <a href="#">CP016012.1</a> |
| Salmonella enterica subsp. enterica serovar Newport str. WA_14882, complete genome              | 1459 | 1459 | 100% | 0.0 | 100% | <a href="#">CP016357.1</a> |
| Salmonella enterica subsp. enterica serovar Newport strain 0307-213, complete genome            | 1459 | 1459 | 100% | 0.0 | 100% | <a href="#">CP012599.1</a> |
| Salmonella enterica subsp. enterica serovar Newport strain 0211-109, complete genome            | 1459 | 1459 | 100% | 0.0 | 100% | <a href="#">CP012598.1</a> |
| Salmonella enterica subsp. enterica serovar Newport strain 0112-791, complete genome            | 1459 | 1459 | 100% | 0.0 | 100% | <a href="#">CP012597.1</a> |
| Salmonella enterica strain FORC_019, complete genome                                            | 1459 | 1459 | 100% | 0.0 | 100% | <a href="#">CP012396.1</a> |
| Salmonella enterica subsp. enterica serovar Enteritidis strain OLF-00D989 87-1, complete genome | 1459 | 1459 | 100% | 0.0 | 100% | <a href="#">CP011942.1</a> |
| Salmonella enterica subsp. enterica serovar Enteritidis str. SA20094177 genome                  | 1459 | 1459 | 100% | 0.0 | 100% | <a href="#">CP007468.2</a> |
| Salmonella enterica subsp. enterica serovar Enteritidis str. EC20110222 genome                  | 1459 | 1459 | 100% | 0.0 | 100% | <a href="#">CP007323.2</a> |
| Salmonella enterica subsp. enterica serovar Enteritidis str. EC20120685 genome                  | 1459 | 1459 | 100% | 0.0 | 100% | <a href="#">CP007339.2</a> |
| Salmonella enterica subsp. enterica serovar Enteritidis str. EC20120213 genome                  | 1459 | 1459 | 100% | 0.0 | 100% | <a href="#">CP007344.2</a> |
| Salmonella enterica subsp. enterica serovar Enteritidis str. EC20120968 genome                  | 1459 | 1459 | 100% | 0.0 | 100% | <a href="#">CP007378.2</a> |
| Salmonella enterica subsp. enterica serovar Enteritidis str. SA20082034, complete genome        | 1459 | 1459 | 100% | 0.0 | 100% | <a href="#">CP007425.2</a> |
| Salmonella enterica subsp. enterica serovar Enteritidis str. EC20111515 genome                  | 1459 | 1459 | 100% | 0.0 | 100% | <a href="#">CP007325.2</a> |
| Salmonella enterica subsp. enterica serovar Enteritidis str. EC20111510 genome                  | 1459 | 1459 | 100% | 0.0 | 100% | <a href="#">CP007498.2</a> |
| Salmonella enterica subsp. enterica serovar Enteritidis str. SA20094301 genome                  | 1459 | 1459 | 100% | 0.0 | 100% | <a href="#">CP007469.2</a> |
| Salmonella enterica subsp. enterica serovar Enteritidis str. SA20084824 genome                  | 1459 | 1459 | 100% | 0.0 | 100% | <a href="#">CP007467.2</a> |
| Salmonella enterica subsp. enterica serovar Enteritidis str. SA20084644 genome                  | 1459 | 1459 | 100% | 0.0 | 100% | <a href="#">CP007466.2</a> |
| Salmonella enterica subsp. enterica serovar Enteritidis str. EC20121747 genome                  | 1459 | 1459 | 100% | 0.0 | 100% | <a href="#">CP007464.2</a> |
| Salmonella enterica subsp. enterica serovar Enteritidis str. EC20120929 genome                  | 1459 | 1459 | 100% | 0.0 | 100% | <a href="#">CP007463.2</a> |
| Salmonella enterica subsp. enterica serovar Enteritidis str. EC20120009 genome                  | 1459 | 1459 | 100% | 0.0 | 100% | <a href="#">CP007438.2</a> |
| Salmonella enterica subsp. enterica serovar Enteritidis str. EC20120051 genome                  | 1459 | 1459 | 100% | 0.0 | 100% | <a href="#">CP007433.2</a> |
| Salmonella enterica subsp. enterica serovar Enteritidis str. EC20121765 genome                  | 1459 | 1459 | 100% | 0.0 | 100% | <a href="#">CP007429.2</a> |

|                                                                                          |      |      |      |     |      |                            |
|------------------------------------------------------------------------------------------|------|------|------|-----|------|----------------------------|
| Salmonella enterica subsp. enterica serovar Enteritidis str. EC20120677 genome           | 1459 | 1459 | 100% | 0.0 | 100% | <a href="#">CP007428.2</a> |
| Salmonella enterica subsp. enterica serovar Enteritidis str. SA20100239 genome           | 1459 | 1459 | 100% | 0.0 | 100% | <a href="#">CP007427.2</a> |
| Salmonella enterica subsp. enterica serovar Enteritidis str. EC20100131 genome           | 1459 | 1459 | 100% | 0.0 | 100% | <a href="#">CP007432.2</a> |
| Salmonella enterica subsp. enterica serovar Enteritidis str. SA20094682 genome           | 1459 | 1459 | 100% | 0.0 | 100% | <a href="#">CP007431.2</a> |
| Salmonella enterica subsp. enterica serovar Enteritidis str. EC20090195 genome           | 1459 | 1459 | 100% | 0.0 | 100% | <a href="#">CP007430.2</a> |
| Salmonella enterica subsp. enterica serovar Enteritidis str. SA20085285, complete genome | 1459 | 1459 | 100% | 0.0 | 100% | <a href="#">CP007426.2</a> |
| Salmonella enterica subsp. enterica serovar Enteritidis str. EC20120774 genome           | 1459 | 1459 | 100% | 0.0 | 100% | <a href="#">CP007404.2</a> |
| Salmonella enterica subsp. enterica serovar Enteritidis str. EC20121542 genome           | 1459 | 1459 | 100% | 0.0 | 100% | <a href="#">CP007368.2</a> |
| Salmonella enterica subsp. enterica serovar Enteritidis str. EC20121541 genome           | 1459 | 1459 | 100% | 0.0 | 100% | <a href="#">CP007367.2</a> |
| Salmonella enterica subsp. enterica serovar Enteritidis str. EC20121004 genome           | 1459 | 1459 | 100% | 0.0 | 100% | <a href="#">CP007366.2</a> |
| Salmonella enterica subsp. enterica serovar Enteritidis str. EC20121744 genome           | 1459 | 1459 | 100% | 0.0 | 100% | <a href="#">CP007373.2</a> |
| Salmonella enterica subsp. enterica serovar Enteritidis str. SA20121703 genome           | 1459 | 1459 | 100% | 0.0 | 100% | <a href="#">CP007372.2</a> |
| Salmonella enterica subsp. enterica serovar Enteritidis str. EC20121689 genome           | 1459 | 1459 | 100% | 0.0 | 100% | <a href="#">CP007371.2</a> |
| Salmonella enterica subsp. enterica serovar Enteritidis str. EC20121671 genome           | 1459 | 1459 | 100% | 0.0 | 100% | <a href="#">CP007369.2</a> |
| Salmonella enterica subsp. enterica serovar Enteritidis str. EC20090531 genome           | 1459 | 1459 | 100% | 0.0 | 100% | <a href="#">CP007422.2</a> |
| Salmonella enterica subsp. enterica serovar Enteritidis str. EC20090884 genome           | 1459 | 1459 | 100% | 0.0 | 100% | <a href="#">CP007421.2</a> |
| Salmonella enterica subsp. enterica serovar Enteritidis str. EC20100103 genome           | 1459 | 1459 | 100% | 0.0 | 100% | <a href="#">CP007420.2</a> |
| Salmonella enterica subsp. enterica serovar Enteritidis str. EC20120200, complete genome | 1459 | 1459 | 100% | 0.0 | 100% | <a href="#">CP007434.2</a> |
| Salmonella enterica subsp. enterica serovar Enteritidis str. EC20130348 genome           | 1459 | 1459 | 100% | 0.0 | 100% | <a href="#">CP007424.2</a> |
| Salmonella enterica subsp. enterica serovar Enteritidis str. EC20130347 genome           | 1459 | 1459 | 100% | 0.0 | 100% | <a href="#">CP007423.2</a> |
| Salmonella enterica subsp. enterica serovar Enteritidis str. EC20130346 genome           | 1459 | 1459 | 100% | 0.0 | 100% | <a href="#">CP007419.2</a> |
| Salmonella enterica subsp. enterica serovar Enteritidis str. EC20130345 genome           | 1459 | 1459 | 100% | 0.0 | 100% | <a href="#">CP007418.2</a> |
| Salmonella enterica subsp. enterica serovar Enteritidis str. SA20123395 genome           | 1459 | 1459 | 100% | 0.0 | 100% | <a href="#">CP007417.2</a> |
| Salmonella enterica subsp. enterica serovar Enteritidis str. EC20122045 genome           | 1459 | 1459 | 100% | 0.0 | 100% | <a href="#">CP007416.2</a> |
| Salmonella enterica subsp. enterica serovar Enteritidis str. EC20122033 genome           | 1459 | 1459 | 100% | 0.0 | 100% | <a href="#">CP007415.2</a> |
| Salmonella enterica subsp. enterica serovar Enteritidis str. EC20120528 genome           | 1459 | 1459 | 100% | 0.0 | 100% | <a href="#">CP007354.2</a> |
| Salmonella enterica subsp. enterica serovar Enteritidis str. SA20100349 genome           | 1459 | 1459 | 100% | 0.0 | 100% | <a href="#">CP007361.2</a> |
| Salmonella enterica subsp. enterica serovar Enteritidis str. EC20100134 genome           | 1459 | 1459 | 100% | 0.0 | 100% | <a href="#">CP007359.2</a> |
| Salmonella enterica subsp. enterica serovar Enteritidis str. EC20100130 genome           | 1459 | 1459 | 100% | 0.0 | 100% | <a href="#">CP007358.2</a> |
| Salmonella enterica subsp. enterica serovar Enteritidis str. EC20100100 genome           | 1459 | 1459 | 100% | 0.0 | 100% | <a href="#">CP007357.2</a> |
| Salmonella enterica subsp. enterica serovar Enteritidis str. EC20121825 genome           | 1459 | 1459 | 100% | 0.0 | 100% | <a href="#">CP007382.2</a> |
| Salmonella enterica subsp. enterica serovar                                              |      |      |      |     |      |                            |

|                                                                                          |      |      |      |     |      |                            |
|------------------------------------------------------------------------------------------|------|------|------|-----|------|----------------------------|
| Enteritidis str. EC20121812 genome                                                       | 1459 | 1459 | 100% | 0.0 | 100% | <a href="#">CP007381.2</a> |
| Salmonella enterica subsp. enterica serovar Enteritidis str. EC20120970 genome           | 1459 | 1459 | 100% | 0.0 | 100% | <a href="#">CP007380.2</a> |
| Salmonella enterica subsp. enterica serovar Enteritidis str. EC20120969 genome           | 1459 | 1459 | 100% | 0.0 | 100% | <a href="#">CP007379.2</a> |
| Salmonella enterica subsp. enterica serovar Enteritidis str. EC20120963 genome           | 1459 | 1459 | 100% | 0.0 | 100% | <a href="#">CP007377.2</a> |
| Salmonella enterica subsp. enterica serovar Enteritidis str. EC20120927 genome           | 1459 | 1459 | 100% | 0.0 | 100% | <a href="#">CP007376.2</a> |
| Salmonella enterica subsp. enterica serovar Enteritidis str. EC20120994 genome           | 1459 | 1459 | 100% | 0.0 | 100% | <a href="#">CP007365.2</a> |
| Salmonella enterica subsp. enterica serovar Enteritidis str. SA20094350 genome           | 1459 | 1459 | 100% | 0.0 | 100% | <a href="#">CP007311.2</a> |
| Salmonella enterica subsp. enterica serovar Enteritidis str. SA20094079 genome           | 1459 | 1459 | 100% | 0.0 | 100% | <a href="#">CP007310.2</a> |
| Salmonella enterica subsp. enterica serovar Enteritidis str. SA20093977 genome           | 1459 | 1459 | 100% | 0.0 | 100% | <a href="#">CP007309.2</a> |
| Salmonella enterica subsp. enterica serovar Enteritidis str. SA20093950 genome           | 1459 | 1459 | 100% | 0.0 | 100% | <a href="#">CP007308.2</a> |
| Salmonella enterica subsp. enterica serovar Enteritidis str. SA20093788 genome           | 1459 | 1459 | 100% | 0.0 | 100% | <a href="#">CP007307.2</a> |
| Salmonella enterica subsp. enterica serovar Enteritidis str. SA20092320 genome           | 1459 | 1459 | 100% | 0.0 | 100% | <a href="#">CP007334.2</a> |
| Salmonella enterica subsp. enterica serovar Enteritidis str. EC20121177, complete genome | 1459 | 1459 | 100% | 0.0 | 100% | <a href="#">CP007333.2</a> |
| Salmonella enterica subsp. enterica serovar Enteritidis str. EC20120555 genome           | 1459 | 1459 | 100% | 0.0 | 100% | <a href="#">CP007364.2</a> |
| Salmonella enterica subsp. enterica serovar Enteritidis str. EC20120548 genome           | 1459 | 1459 | 100% | 0.0 | 100% | <a href="#">CP007363.2</a> |
| Salmonella enterica subsp. enterica serovar Enteritidis str. EC20120544 genome           | 1459 | 1459 | 100% | 0.0 | 100% | <a href="#">CP007362.2</a> |
| Salmonella enterica subsp. enterica serovar Enteritidis str. EC20121750 genome           | 1459 | 1459 | 100% | 0.0 | 100% | <a href="#">CP007396.2</a> |
| Salmonella enterica subsp. enterica serovar Enteritidis str. EC20121746 genome           | 1459 | 1459 | 100% | 0.0 | 100% | <a href="#">CP007374.2</a> |
| Salmonella enterica subsp. enterica serovar Enteritidis str. EC20120925 genome           | 1459 | 1459 | 100% | 0.0 | 100% | <a href="#">CP007375.2</a> |
| Salmonella enterica subsp. enterica serovar Enteritidis str. EC20120775 genome           | 1459 | 1459 | 100% | 0.0 | 100% | <a href="#">CP007405.2</a> |
| Salmonella enterica subsp. enterica serovar Enteritidis str. EC20100325 genome           | 1459 | 1459 | 100% | 0.0 | 100% | <a href="#">CP007360.2</a> |
| Salmonella enterica subsp. enterica serovar Enteritidis str. EC20120505 genome           | 1459 | 1459 | 100% | 0.0 | 100% | <a href="#">CP007353.2</a> |
| Salmonella enterica subsp. enterica serovar Enteritidis str. EC20120498 genome           | 1459 | 1459 | 100% | 0.0 | 100% | <a href="#">CP007352.2</a> |
| Salmonella enterica subsp. enterica serovar Enteritidis str. EC20120497 genome           | 1459 | 1459 | 100% | 0.0 | 100% | <a href="#">CP007351.2</a> |
| Salmonella enterica subsp. enterica serovar Enteritidis str. EC20120496 genome           | 1459 | 1459 | 100% | 0.0 | 100% | <a href="#">CP007350.2</a> |
| Salmonella enterica subsp. enterica serovar Enteritidis str. EC20120469 genome           | 1459 | 1459 | 100% | 0.0 | 100% | <a href="#">CP007349.2</a> |
| Salmonella enterica subsp. enterica serovar Enteritidis str. EC20120356 genome           | 1459 | 1459 | 100% | 0.0 | 100% | <a href="#">CP007348.2</a> |
| Salmonella enterica subsp. enterica serovar Enteritidis str. EC20120240 genome           | 1459 | 1459 | 100% | 0.0 | 100% | <a href="#">CP007347.2</a> |
| Salmonella enterica subsp. enterica serovar Enteritidis str. EC20120229 genome           | 1459 | 1459 | 100% | 0.0 | 100% | <a href="#">CP007346.2</a> |
| Salmonella enterica subsp. enterica serovar Enteritidis str. EC20120219 genome           | 1459 | 1459 | 100% | 0.0 | 100% | <a href="#">CP007345.2</a> |
| Salmonella enterica subsp. enterica serovar Enteritidis str. EC20120686 genome           | 1459 | 1459 | 100% | 0.0 | 100% | <a href="#">CP007340.2</a> |
| Salmonella enterica subsp. enterica serovar Enteritidis str. EC20120597 genome           | 1459 | 1459 | 100% | 0.0 | 100% | <a href="#">CP007338.2</a> |

|                                                                                          |      |      |      |     |      |                            |
|------------------------------------------------------------------------------------------|------|------|------|-----|------|----------------------------|
| Salmonella enterica subsp. enterica serovar Enteritidis str. EC20120580 genome           | 1459 | 1459 | 100% | 0.0 | 100% | <a href="#">CP007335.2</a> |
| Salmonella enterica subsp. enterica serovar Enteritidis str. EC20111576 genome           | 1459 | 1459 | 100% | 0.0 | 100% | <a href="#">CP007328.2</a> |
| Salmonella enterica subsp. enterica serovar Enteritidis str. EC20111554 genome           | 1459 | 1459 | 100% | 0.0 | 100% | <a href="#">CP007326.2</a> |
| Salmonella enterica subsp. enterica serovar Enteritidis str. EC20111514 genome           | 1459 | 1459 | 100% | 0.0 | 100% | <a href="#">CP007324.2</a> |
| Salmonella enterica subsp. enterica serovar Enteritidis str. SA20095440, complete genome | 1459 | 1459 | 100% | 0.0 | 100% | <a href="#">CP007319.2</a> |
| Salmonella enterica subsp. enterica serovar Enteritidis str. SA20094389 genome           | 1459 | 1459 | 100% | 0.0 | 100% | <a href="#">CP007314.2</a> |
| Salmonella enterica subsp. enterica serovar Enteritidis str. SA20094383 genome           | 1459 | 1459 | 100% | 0.0 | 100% | <a href="#">CP007313.2</a> |
| Salmonella enterica subsp. enterica serovar Enteritidis str. SA20094352 complete genome  | 1459 | 1459 | 100% | 0.0 | 100% | <a href="#">CP007312.2</a> |
| Salmonella enterica subsp. enterica serovar Enteritidis str. SA20093784 genome           | 1459 | 1459 | 100% | 0.0 | 100% | <a href="#">CP007306.2</a> |
| Salmonella enterica subsp. enterica serovar Enteritidis str. SA20093543 genome           | 1459 | 1459 | 100% | 0.0 | 100% | <a href="#">CP007305.2</a> |
| Salmonella enterica subsp. enterica serovar Enteritidis str. SA20093538 genome           | 1459 | 1459 | 100% | 0.0 | 100% | <a href="#">CP007304.2</a> |
| Salmonella enterica subsp. enterica serovar Enteritidis str. SA20093430 genome           | 1459 | 1459 | 100% | 0.0 | 100% | <a href="#">CP007303.2</a> |
| Salmonella enterica subsp. enterica serovar Enteritidis str. EC20100089 genome           | 1459 | 1459 | 100% | 0.0 | 100% | <a href="#">CP007356.2</a> |
| Salmonella enterica subsp. enterica serovar Enteritidis str. EC20100088 genome           | 1459 | 1459 | 100% | 0.0 | 100% | <a href="#">CP007355.2</a> |
| Salmonella enterica subsp. enterica serovar Enteritidis str. EC20090530 genome           | 1459 | 1459 | 100% | 0.0 | 100% | <a href="#">CP007298.2</a> |
| Salmonella enterica subsp. enterica serovar Enteritidis str. SA20090435 genome           | 1459 | 1459 | 100% | 0.0 | 100% | <a href="#">CP007297.2</a> |
| Salmonella enterica subsp. enterica serovar Enteritidis str. SA20090419 genome           | 1459 | 1459 | 100% | 0.0 | 100% | <a href="#">CP007296.2</a> |
| Salmonella enterica subsp. enterica serovar Enteritidis str. SA19981522, complete genome | 1459 | 1459 | 100% | 0.0 | 100% | <a href="#">CP007286.2</a> |
| Salmonella enterica subsp. enterica serovar Enteritidis str. SA19980677, complete genome | 1459 | 1459 | 100% | 0.0 | 100% | <a href="#">CP007285.2</a> |
| Salmonella enterica subsp. enterica serovar Enteritidis str. SA19970769, complete genome | 1459 | 1459 | 100% | 0.0 | 100% | <a href="#">CP007283.2</a> |
| Salmonella enterica subsp. enterica serovar Enteritidis str. SA19992322 genome           | 1459 | 1459 | 100% | 0.0 | 100% | <a href="#">CP007291.2</a> |
| Salmonella enterica subsp. enterica serovar Enteritidis str. SA19983126 genome           | 1459 | 1459 | 100% | 0.0 | 100% | <a href="#">CP007290.2</a> |
| Salmonella enterica subsp. enterica serovar Enteritidis str. SA19982831 genome           | 1459 | 1459 | 100% | 0.0 | 100% | <a href="#">CP007289.2</a> |
| Salmonella enterica subsp. enterica serovar Enteritidis str. SA19981857, complete genome | 1459 | 1459 | 100% | 0.0 | 100% | <a href="#">CP007288.2</a> |
| Salmonella enterica subsp. enterica serovar Enteritidis str. SA19930684 genome           | 1459 | 1459 | 100% | 0.0 | 100% | <a href="#">CP007277.2</a> |
| Salmonella enterica subsp. enterica serovar Enteritidis str. SA20084384 genome           | 1459 | 1459 | 100% | 0.0 | 100% | <a href="#">CP007295.2</a> |
| Salmonella enterica subsp. enterica serovar Enteritidis str. SA20083636, complete genome | 1459 | 1459 | 100% | 0.0 | 100% | <a href="#">CP007294.2</a> |
| Salmonella enterica subsp. enterica serovar Enteritidis str. SA20083456 genome           | 1459 | 1459 | 100% | 0.0 | 100% | <a href="#">CP007293.2</a> |
| Salmonella enterica subsp. enterica serovar Enteritidis str. SA19994216, complete genome | 1459 | 1459 | 100% | 0.0 | 100% | <a href="#">CP007292.2</a> |



|                                                                                          |      |      |      |     |      |                            |
|------------------------------------------------------------------------------------------|------|------|------|-----|------|----------------------------|
| Salmonella enterica subsp. enterica serovar Enteritidis str. SA19970510, complete genome | 1459 | 1459 | 100% | 0.0 | 100% | <a href="#">CP007282.2</a> |
| Salmonella enterica subsp. enterica serovar Enteritidis str. SA19961622 genome           | 1459 | 1459 | 100% | 0.0 | 100% | <a href="#">CP007281.2</a> |
| Salmonella enterica subsp. enterica serovar Enteritidis str. SA19960848, complete genome | 1459 | 1459 | 100% | 0.0 | 100% | <a href="#">CP007280.2</a> |
| Salmonella enterica subsp. enterica serovar Enteritidis str. SA19943269 genome           | 1459 | 1459 | 100% | 0.0 | 100% | <a href="#">CP007279.2</a> |
| Salmonella enterica subsp. enterica serovar Enteritidis str. SA19942384 genome           | 1459 | 1459 | 100% | 0.0 | 100% | <a href="#">CP007278.2</a> |
| Salmonella enterica subsp. enterica serovar Enteritidis str. SA20091739 genome           | 1459 | 1459 | 100% | 0.0 | 100% | <a href="#">CP007301.2</a> |
| Salmonella enterica subsp. enterica serovar Enteritidis str. SA20090877 genome           | 1459 | 1459 | 100% | 0.0 | 100% | <a href="#">CP007300.2</a> |
| Salmonella enterica subsp. enterica serovar Enteritidis str. SA20093266 genome           | 1459 | 1459 | 100% | 0.0 | 100% | <a href="#">CP007274.2</a> |
| Salmonella enterica subsp. enterica serovar Enteritidis str. EC20121180 genome           | 1459 | 1459 | 100% | 0.0 | 100% | <a href="#">CP007273.2</a> |
| Salmonella enterica subsp. enterica serovar Enteritidis str. EC20121179 genome           | 1459 | 1459 | 100% | 0.0 | 100% | <a href="#">CP007272.2</a> |
| Salmonella enterica subsp. enterica serovar Enteritidis str. EC20121178, complete genome | 1459 | 1459 | 100% | 0.0 | 100% | <a href="#">CP007271.2</a> |
| Salmonella enterica subsp. enterica serovar Enteritidis str. EC20121176 genome           | 1459 | 1459 | 100% | 0.0 | 100% | <a href="#">CP007270.2</a> |
| Salmonella enterica subsp. enterica serovar Enteritidis str. EC20122031 genome           | 1459 | 1459 | 100% | 0.0 | 100% | <a href="#">CP007414.2</a> |
| Salmonella enterica subsp. enterica serovar Enteritidis str. EC20122026 genome           | 1459 | 1459 | 100% | 0.0 | 100% | <a href="#">CP007413.2</a> |
| Salmonella enterica subsp. enterica serovar Enteritidis str. EC20121990 genome           | 1459 | 1459 | 100% | 0.0 | 100% | <a href="#">CP007411.2</a> |
| Salmonella enterica subsp. enterica serovar Enteritidis str. SA19971331 genome           | 1459 | 1459 | 100% | 0.0 | 100% | <a href="#">CP007284.2</a> |
| Salmonella enterica subsp. enterica serovar Enteritidis str. EC20110223 genome           | 1459 | 1459 | 100% | 0.0 | 100% | <a href="#">CP007266.2</a> |
| Salmonella enterica subsp. enterica serovar Enteritidis str. EC20120918 genome           | 1459 | 1459 | 100% | 0.0 | 100% | <a href="#">CP007408.2</a> |
| Salmonella enterica subsp. enterica serovar Enteritidis str. EC20120917 genome           | 1459 | 1459 | 100% | 0.0 | 100% | <a href="#">CP007407.2</a> |
| Salmonella enterica subsp. enterica serovar Enteritidis str. EC20120776 genome           | 1459 | 1459 | 100% | 0.0 | 100% | <a href="#">CP007406.2</a> |
| Salmonella enterica subsp. enterica serovar Enteritidis str. EC20120773 genome           | 1459 | 1459 | 100% | 0.0 | 100% | <a href="#">CP007403.2</a> |
| Salmonella enterica subsp. enterica serovar Enteritidis str. EC20120765 genome           | 1459 | 1459 | 100% | 0.0 | 100% | <a href="#">CP007402.2</a> |
| Salmonella enterica subsp. enterica serovar Enteritidis str. EC20120734 genome           | 1459 | 1459 | 100% | 0.0 | 100% | <a href="#">CP007400.2</a> |
| Salmonella enterica subsp. enterica serovar Enteritidis str. EC20121753 genome           | 1459 | 1459 | 100% | 0.0 | 100% | <a href="#">CP007398.2</a> |
| Salmonella enterica subsp. enterica serovar Enteritidis str. EC20121751 genome           | 1459 | 1459 | 100% | 0.0 | 100% | <a href="#">CP007397.2</a> |
| Salmonella enterica subsp. enterica serovar Enteritidis str. EC20121748 genome           | 1459 | 1459 | 100% | 0.0 | 100% | <a href="#">CP007395.2</a> |
| Salmonella enterica subsp. enterica serovar Enteritidis str. EC20121989 genome           | 1459 | 1459 | 100% | 0.0 | 100% | <a href="#">CP007388.2</a> |
| Salmonella enterica subsp. enterica serovar Enteritidis str. EC20121986 genome           | 1459 | 1459 | 100% | 0.0 | 100% | <a href="#">CP007387.2</a> |
| Salmonella enterica subsp. enterica serovar Enteritidis str. EC20121976 genome           | 1459 | 1459 | 100% | 0.0 | 100% | <a href="#">CP007386.2</a> |
| Salmonella enterica subsp. enterica serovar Enteritidis str. EC20121970 genome           | 1459 | 1459 | 100% | 0.0 | 100% | <a href="#">CP007385.2</a> |
| Salmonella enterica subsp. enterica serovar Enteritidis str. EC20121969 genome           | 1459 | 1459 | 100% | 0.0 | 100% | <a href="#">CP007384.2</a> |

|                                                                                                 |      |      |      |     |      |                            |
|-------------------------------------------------------------------------------------------------|------|------|------|-----|------|----------------------------|
| Salmonella enterica subsp. enterica serovar Enteritidis str. EC20121826 genome                  | 1459 | 1459 | 100% | 0.0 | 100% | <a href="#">CP007383.2</a> |
| Salmonella enterica subsp. enterica serovar Enteritidis str. EC20120722 genome                  | 1459 | 1459 | 100% | 0.0 | 100% | <a href="#">CP007343.2</a> |
| Salmonella enterica subsp. enterica serovar Enteritidis str. EC20120697 genome                  | 1459 | 1459 | 100% | 0.0 | 100% | <a href="#">CP007342.2</a> |
| Salmonella enterica subsp. enterica serovar Enteritidis str. EC20120687 genome                  | 1459 | 1459 | 100% | 0.0 | 100% | <a href="#">CP007341.2</a> |
| Salmonella enterica subsp. enterica serovar Enteritidis str. EC20120007 genome                  | 1459 | 1459 | 100% | 0.0 | 100% | <a href="#">CP007331.2</a> |
| Salmonella enterica subsp. enterica serovar Enteritidis str. EC20120003 genome                  | 1459 | 1459 | 100% | 0.0 | 100% | <a href="#">CP007330.2</a> |
| Salmonella enterica subsp. enterica serovar Enteritidis str. EC20111561 genome                  | 1459 | 1459 | 100% | 0.0 | 100% | <a href="#">CP007327.2</a> |
| Salmonella enterica subsp. enterica serovar Enteritidis str. EC20090332 genome                  | 1459 | 1459 | 100% | 0.0 | 100% | <a href="#">CP007322.2</a> |
| Salmonella enterica subsp. enterica serovar Enteritidis str. EC20090193 genome                  | 1459 | 1459 | 100% | 0.0 | 100% | <a href="#">CP007321.2</a> |
| Salmonella enterica subsp. enterica serovar Enteritidis str. EC20090135 genome                  | 1459 | 1459 | 100% | 0.0 | 100% | <a href="#">CP007320.2</a> |
| Salmonella enterica subsp. enterica serovar Enteritidis str. SA20095309 genome                  | 1459 | 1459 | 100% | 0.0 | 100% | <a href="#">CP007318.2</a> |
| Salmonella enterica subsp. enterica serovar Enteritidis str. SA20094803 genome                  | 1459 | 1459 | 100% | 0.0 | 100% | <a href="#">CP007317.2</a> |
| Salmonella enterica subsp. enterica serovar Enteritidis str. SA20094642 genome                  | 1459 | 1459 | 100% | 0.0 | 100% | <a href="#">CP007316.2</a> |
| Salmonella enterica subsp. enterica serovar Enteritidis str. SA20094521 genome                  | 1459 | 1459 | 100% | 0.0 | 100% | <a href="#">CP007315.2</a> |
| Salmonella enterica subsp. enterica serovar Enteritidis str. EC20120590 genome                  | 1459 | 1459 | 100% | 0.0 | 100% | <a href="#">CP007337.2</a> |
| Salmonella enterica subsp. enterica serovar Enteritidis strain CMCC50041, complete genome       | 1459 | 1459 | 100% | 0.0 | 100% | <a href="#">CP013097.1</a> |
| Salmonella enterica subsp. enterica serovar Enteritidis strain FORC_007, complete genome        | 1459 | 1459 | 100% | 0.0 | 100% | <a href="#">CP009768.1</a> |
| Salmonella enterica subsp. enterica serovar Enteritidis strain SEE2, complete genome            | 1459 | 1459 | 100% | 0.0 | 100% | <a href="#">CP011791.1</a> |
| Salmonella enterica subsp. enterica serovar Enteritidis strain SEE1, complete genome            | 1459 | 1459 | 100% | 0.0 | 100% | <a href="#">CP011790.1</a> |
| Salmonella enterica subsp. enterica serovar Enteritidis str. EC20120005, complete genome        | 1459 | 1459 | 100% | 0.0 | 100% | <a href="#">CP007267.2</a> |
| Salmonella enterica subsp. enterica serovar Enteritidis str. EC20120002 genome                  | 1459 | 1459 | 100% | 0.0 | 100% | <a href="#">CP007329.2</a> |
| Salmonella enterica subsp. enterica serovar Enteritidis str. EC20090641, complete genome        | 1459 | 1459 | 100% | 0.0 | 100% | <a href="#">CP007249.2</a> |
| Salmonella enterica subsp. enterica serovar Enteritidis str. 18569, complete genome             | 1459 | 1459 | 100% | 0.0 | 100% | <a href="#">CP011394.1</a> |
| Salmonella enterica subsp. enterica serovar Newport str. CVM 21550, complete genome             | 1459 | 1459 | 100% | 0.0 | 100% | <a href="#">CP010283.1</a> |
| Salmonella enterica subsp. enterica serovar Newport str. CVM 21538, complete genome             | 1459 | 1459 | 100% | 0.0 | 100% | <a href="#">CP010282.1</a> |
| Salmonella enterica subsp. enterica serovar Newport str. CVM 22513, complete genome             | 1459 | 1459 | 100% | 0.0 | 100% | <a href="#">CP010281.1</a> |
| Salmonella enterica subsp. enterica serovar Newport str. CVM 22425, complete genome             | 1459 | 1459 | 100% | 0.0 | 100% | <a href="#">CP010279.1</a> |
| Salmonella enterica subsp. enterica serovar Newport str. CVMN1543, complete genome              | 1459 | 1459 | 100% | 0.0 | 100% | <a href="#">CP010284.1</a> |
| Salmonella enterica subsp. enterica serovar Enteritidis strain OLF-SE2-98984-6, complete genome | 1459 | 1459 | 100% | 0.0 | 100% | <a href="#">CP009084.2</a> |
| Salmonella enterica subsp. enterica serovar Enteritidis strain OLF-SE3-98983-4, complete genome | 1459 | 1459 | 100% | 0.0 | 100% | <a href="#">CP009085.2</a> |



|                                                                                                  |      |      |      |     |      |                            |
|--------------------------------------------------------------------------------------------------|------|------|------|-----|------|----------------------------|
| Salmonella enterica subsp. enterica serovar Newport str. CVM 22462, complete genome              | 1459 | 1459 | 100% | 0.0 | 100% | <a href="#">CP010280.1</a> |
| Salmonella enterica subsp. enterica serovar Newport str. CVM N18486, complete genome             | 1459 | 1459 | 100% | 0.0 | 100% | <a href="#">CP009561.1</a> |
| Salmonella enterica subsp. enterica serovar Enteritidis strain SEJ, complete genome              | 1459 | 1459 | 100% | 0.0 | 100% | <a href="#">CP008928.1</a> |
| Salmonella enterica subsp. enterica serovar Enteritidis strain OLF-SE6-00219-16, complete genome | 1459 | 1459 | 100% | 0.0 | 100% | <a href="#">CP009088.1</a> |
| Salmonella enterica subsp. enterica serovar Enteritidis strain OLF-SE1-1019-1, complete genome   | 1459 | 1459 | 100% | 0.0 | 100% | <a href="#">CP009083.1</a> |
| Salmonella enterica subsp. enterica serovar Enteritidis strain OLF-SE5-1104-2, complete genome   | 1459 | 1459 | 100% | 0.0 | 100% | <a href="#">CP009087.1</a> |
| Salmonella enterica subsp. enterica serovar Enteritidis strain OLF-SE4-0317-8, complete genome   | 1459 | 1459 | 100% | 0.0 | 100% | <a href="#">CP009086.1</a> |
| Salmonella enterica subsp. enterica serovar Enteritidis strain OLF-SE11-10058, complete genome   | 1459 | 1459 | 100% | 0.0 | 100% | <a href="#">CP009093.1</a> |
| Salmonella enterica subsp. enterica serovar Enteritidis strain OLF-SE10-10052, complete genome   | 1459 | 1459 | 100% | 0.0 | 100% | <a href="#">CP009092.1</a> |
| Salmonella enterica subsp. enterica serovar Enteritidis strain OLF-SE8-1021710, complete genome  | 1459 | 1459 | 100% | 0.0 | 100% | <a href="#">CP009090.1</a> |
| Salmonella enterica subsp. enterica serovar Enteritidis strain OLF-SE7-100819, complete genome   | 1459 | 1459 | 100% | 0.0 | 100% | <a href="#">CP009089.1</a> |
| Salmonella enterica subsp. enterica serovar Enteritidis str. 77-1427, complete genome            | 1459 | 1459 | 100% | 0.0 | 100% | <a href="#">CP007598.1</a> |
| Salmonella enterica subsp. enterica serovar Enteritidis str. CDC_2010K_0968, complete genome     | 1459 | 1459 | 100% | 0.0 | 100% | <a href="#">CP007528.1</a> |
| Salmonella enterica subsp. enterica serovar Enteritidis strain Durban, complete genome           | 1459 | 1459 | 100% | 0.0 | 100% | <a href="#">CP007507.1</a> |
| Salmonella enterica subsp. enterica serovar Enteritidis str. EC20090698, complete genome         | 1459 | 1459 | 100% | 0.0 | 100% | <a href="#">CP007248.1</a> |
| Salmonella enterica subsp. enterica serovar Enteritidis str. EC20110221, complete genome         | 1459 | 1459 | 100% | 0.0 | 100% | <a href="#">CP007247.1</a> |
| Salmonella enterica subsp. enterica serovar Enteritidis str. EC20100101, complete genome         | 1459 | 1459 | 100% | 0.0 | 100% | <a href="#">CP007246.1</a> |
| Salmonella enterica subsp. enterica serovar Enteritidis str. EC20120008, complete genome         | 1459 | 1459 | 100% | 0.0 | 100% | <a href="#">CP007245.1</a> |
| Salmonella enterica subsp. enterica serovar Enteritidis str. EC20110354, complete genome         | 1459 | 1459 | 100% | 0.0 | 100% | <a href="#">CP007175.1</a> |
| Salmonella enterica subsp. enterica serovar Enteritidis str. EC20111174, complete genome         | 1459 | 1459 | 100% | 0.0 | 100% | <a href="#">CP007253.1</a> |
| Salmonella enterica subsp. enterica serovar Enteritidis str. EC20111175, complete genome         | 1459 | 1459 | 100% | 0.0 | 100% | <a href="#">CP007252.1</a> |
| Salmonella enterica subsp. enterica serovar Enteritidis str. EC20110353, complete genome         | 1459 | 1459 | 100% | 0.0 | 100% | <a href="#">CP007251.1</a> |
| Salmonella enterica subsp. enterica serovar Enteritidis str. EC20110355, complete genome         | 1459 | 1459 | 100% | 0.0 | 100% | <a href="#">CP007250.1</a> |
| Salmonella enterica subsp. enterica serovar Enteritidis str. SA19940857 genome                   | 1459 | 1459 | 100% | 0.0 | 100% | <a href="#">CP007465.1</a> |
| Salmonella enterica subsp. enterica serovar                                                      |      |      |      |     |      |                            |

|                                                                                               |      |      |      |     |      |                            |
|-----------------------------------------------------------------------------------------------|------|------|------|-----|------|----------------------------|
| Enteritidis str. EC20111095, complete genome                                                  | 1459 | 1459 | 100% | 0.0 | 100% | <a href="#">CP007254.1</a> |
| Salmonella enterica subsp. enterica serovar Enteritidis str. EC20120916 genome                | 1459 | 1459 | 100% | 0.0 | 100% | <a href="#">CP007332.1</a> |
| Salmonella enterica subsp. enterica serovar Enteritidis str. EC20110356, complete genome      | 1459 | 1459 | 100% | 0.0 | 100% | <a href="#">CP007262.1</a> |
| Salmonella enterica subsp. enterica serovar Enteritidis str. EC20110357, complete genome      | 1459 | 1459 | 100% | 0.0 | 100% | <a href="#">CP007261.1</a> |
| Salmonella enterica subsp. enterica serovar Enteritidis str. EC20110358, complete genome      | 1459 | 1459 | 100% | 0.0 | 100% | <a href="#">CP007260.1</a> |
| Salmonella enterica subsp. enterica serovar Enteritidis str. EC20110359, complete genome      | 1459 | 1459 | 100% | 0.0 | 100% | <a href="#">CP007259.1</a> |
| Salmonella enterica subsp. enterica serovar Enteritidis str. EC20110360, complete genome      | 1459 | 1459 | 100% | 0.0 | 100% | <a href="#">CP007258.1</a> |
| Salmonella enterica subsp. enterica serovar Enteritidis str. EC20110361, complete genome      | 1459 | 1459 | 100% | 0.0 | 100% | <a href="#">CP007263.1</a> |
| Salmonella enterica subsp. enterica serovar Newport str. USMARC-S3124.1, complete genome      | 1459 | 1459 | 100% | 0.0 | 100% | <a href="#">CP006631.1</a> |
| Salmonella enterica subsp. enterica serovar Enteritidis str. P125109 complete genome          | 1459 | 1459 | 100% | 0.0 | 100% | <a href="#">AM933172.1</a> |
| Salmonella enterica subsp. enterica serovar Gallinarum str. 287/91 complete genome            | 1459 | 1459 | 100% | 0.0 | 100% | <a href="#">AM933173.1</a> |
| Salmonella enterica subsp. enterica serovar Newport str. SL254, complete genome               | 1459 | 1459 | 100% | 0.0 | 100% | <a href="#">CP001113.1</a> |
| Salmonella enterica subsp. enterica serovar Enteritidis str. EC20122022 genome                | 1456 | 1456 | 100% | 0.0 | 99%  | <a href="#">CP007412.2</a> |
| Salmonella enterica subsp. enterica serovar Enteritidis str. EC20120738 genome                | 1456 | 1456 | 100% | 0.0 | 99%  | <a href="#">CP007401.2</a> |
| Salmonella enterica subsp. enterica serovar Enteritidis str. EC20121672 genome                | 1456 | 1456 | 100% | 0.0 | 99%  | <a href="#">CP007370.2</a> |
| Salmonella enterica subsp. enterica serovar Enteritidis str. EC20120581 genome                | 1456 | 1456 | 100% | 0.0 | 99%  | <a href="#">CP007336.2</a> |
| Salmonella enterica subsp. enterica serovar Enteritidis str. SA20093421 genome                | 1456 | 1456 | 100% | 0.0 | 99%  | <a href="#">CP007302.2</a> |
| Salmonella enterica subsp. enterica serovar Newport str. CVM 21554, complete genome           | 1454 | 1454 | 100% | 0.0 | 99%  | <a href="#">CP009565.1</a> |
| Salmonella enterica subsp. enterica serovar Enteritidis strain OLF-SE9-10012, complete genome | 1454 | 1454 | 100% | 0.0 | 99%  | <a href="#">CP009091.1</a> |
| Salmonella enterica subsp. enterica serovar Nitra strain S-1687, complete genome              | 1448 | 1448 | 100% | 0.0 | 99%  | <a href="#">CP019416.1</a> |
| Salmonella enterica subsp. enterica serovar Abony str. 0014, complete genome                  | 1447 | 1447 | 99%  | 0.0 | 99%  | <a href="#">CP007534.1</a> |
| Salmonella enterica subsp. enterica strain FDAARGOS_54 chromosome, complete genome            | 1437 | 1437 | 100% | 0.0 | 99%  | <a href="#">CP026976.1</a> |
| Salmonella enterica subsp. enterica serovar Crossness str. 1422-74, complete genome           | 1437 | 1437 | 100% | 0.0 | 99%  | <a href="#">CP019408.1</a> |
| Salmonella enterica subsp. enterica serovar Heidelberg str. SARA35, complete genome           | 1437 | 1437 | 100% | 0.0 | 99%  | <a href="#">CP019176.1</a> |
| Salmonella enterica subsp. enterica serovar Heidelberg strain SH13-004, complete genome       | 1437 | 1437 | 100% | 0.0 | 99%  | <a href="#">CP016586.1</a> |
| Salmonella enterica subsp. enterica serovar Heidelberg strain SH14-009, complete genome       | 1437 | 1437 | 100% | 0.0 | 99%  | <a href="#">CP016581.1</a> |
| Salmonella enterica subsp. enterica serovar Heidelberg strain SH13-006, complete genome       | 1437 | 1437 | 100% | 0.0 | 99%  | <a href="#">CP016579.1</a> |
| Salmonella enterica subsp. enterica serovar                                                   |      |      |      |     |      |                            |

|                                                                                                  |      |      |      |     |     |                            |
|--------------------------------------------------------------------------------------------------|------|------|------|-----|-----|----------------------------|
| Heidelberg strain AMR588-04-00437, complete genome                                               | 1437 | 1437 | 100% | 0.0 | 99% | <a href="#">CP016576.1</a> |
| Salmonella enterica subsp. enterica serovar Heidelberg strain AMR588-04-00435, complete genome   | 1437 | 1437 | 100% | 0.0 | 99% | <a href="#">CP016573.1</a> |
| Salmonella enterica subsp. enterica serovar Heidelberg strain AMR588-04-00320, complete genome   | 1437 | 1437 | 100% | 0.0 | 99% | <a href="#">CP016569.1</a> |
| Salmonella enterica subsp. enterica serovar Heidelberg strain AMR588-04-00318, complete sequence | 1437 | 1437 | 100% | 0.0 | 99% | <a href="#">CP016565.1</a> |
| Salmonella enterica subsp. enterica serovar Heidelberg strain A3EZ223, complete genome           | 1437 | 1437 | 100% | 0.0 | 99% | <a href="#">CP016563.1</a> |
| Salmonella enterica subsp. enterica serovar Heidelberg strain A3ES40, complete genome            | 1437 | 1437 | 100% | 0.0 | 99% | <a href="#">CP016561.1</a> |
| Salmonella enterica subsp. enterica serovar Heidelberg strain 09-036813-1A, complete genome      | 1437 | 1437 | 100% | 0.0 | 99% | <a href="#">CP016525.1</a> |
| Salmonella enterica subsp. enterica serovar Heidelberg strain SA01AB09084001, complete genome    | 1437 | 1437 | 100% | 0.0 | 99% | <a href="#">CP016530.1</a> |
| Salmonella enterica subsp. enterica serovar Heidelberg strain SA02DT09004001, complete genome    | 1437 | 1437 | 100% | 0.0 | 99% | <a href="#">CP016521.1</a> |
| Salmonella enterica subsp. enterica serovar Heidelberg strain CE-R2-11-0435, complete genome     | 1437 | 1437 | 100% | 0.0 | 99% | <a href="#">CP016517.1</a> |
| Salmonella enterica subsp. enterica serovar Heidelberg strain 11-004736-1-7, complete genome     | 1437 | 1437 | 100% | 0.0 | 99% | <a href="#">CP016514.1</a> |
| Salmonella enterica subsp. enterica serovar Heidelberg strain SH14-028, complete genome          | 1437 | 1437 | 100% | 0.0 | 99% | <a href="#">CP016510.1</a> |
| Salmonella enterica subsp. enterica serovar Heidelberg strain SH12-003, complete genome          | 1437 | 1437 | 100% | 0.0 | 99% | <a href="#">CP016507.1</a> |
| Salmonella enterica subsp. enterica serovar Heidelberg strain SH12-007, complete genome          | 1437 | 1437 | 100% | 0.0 | 99% | <a href="#">CP016504.1</a> |
| Salmonella enterica subsp. enterica serovar Heidelberg strain N13-01290, complete genome         | 1437 | 1437 | 100% | 0.0 | 99% | <a href="#">CP012930.1</a> |
| Salmonella enterica subsp. enterica serovar Heidelberg strain 12-4374, complete genome           | 1437 | 1437 | 100% | 0.0 | 99% | <a href="#">CP012924.1</a> |
| Salmonella enterica subsp. enterica serovar Heidelberg strain SA02DT10168701, complete genome    | 1437 | 1437 | 100% | 0.0 | 99% | <a href="#">CP012921.1</a> |
| Salmonella enterica subsp. enterica serovar Heidelberg str. CFSAN002064, complete genome         | 1437 | 1437 | 100% | 0.0 | 99% | <a href="#">CP005995.1</a> |
| Salmonella enterica subsp. enterica serovar Heidelberg str. CFSAN002069, complete genome         | 1437 | 1437 | 100% | 0.0 | 99% | <a href="#">CP005390.2</a> |
| Salmonella enterica subsp. enterica serovar Heidelberg str. 41578, complete genome               | 1437 | 1437 | 100% | 0.0 | 99% | <a href="#">CP004086.1</a> |
| Salmonella enterica subsp. enterica serovar Heidelberg str. B182, complete genome                | 1437 | 1437 | 100% | 0.0 | 99% | <a href="#">CP003416.1</a> |
| Salmonella enterica subsp. enterica serovar Heidelberg str. SL476, complete genome               | 1437 | 1437 | 100% | 0.0 | 99% | <a href="#">CP001120.1</a> |
| Salmonella enterica subsp. enterica serovar Bardo strain SA20113257, complete genome             | 1393 | 1393 | 100% | 0.0 | 98% | <a href="#">CP019404.1</a> |
| Salmonella enterica subsp. enterica serovar Newport strain CFSAN001660, complete genome          | 1393 | 1393 | 100% | 0.0 | 98% | <a href="#">CP016010.1</a> |

|                                                                                                          |      |      |      |     |     |                            |
|----------------------------------------------------------------------------------------------------------|------|------|------|-----|-----|----------------------------|
| Salmonella enterica subsp. enterica serovar Newport str. Levine 15, complete genome                      | 1393 | 1393 | 100% | 0.0 | 98% | <a href="#">CP015924.1</a> |
| Salmonella enterica subsp. enterica serovar Newport str. Levine 1, complete genome                       | 1393 | 1393 | 100% | 0.0 | 98% | <a href="#">CP015923.1</a> |
| Salmonella enterica subsp. enterica serovar Newport str. USDA-ARS-USMARC-1927, complete genome           | 1393 | 1393 | 100% | 0.0 | 98% | <a href="#">CP007216.1</a> |
| Salmonella enterica subsp. enterica serovar Bareilly str. CFSAN000189, complete genome                   | 1393 | 1393 | 100% | 0.0 | 98% | <a href="#">CP006053.1</a> |
| Salmonella enterica subsp. enterica serovar Newport strain CFSAN003387, complete genome                  | 1387 | 1387 | 100% | 0.0 | 98% | <a href="#">CP016014.1</a> |
| Salmonella enterica subsp. enterica serovar Newport str. CDC 2010K-2159, complete genome                 | 1382 | 1382 | 100% | 0.0 | 98% | <a href="#">CP007559.2</a> |
| Salmonella enterica subsp. enterica serovar Typhimurium strain FORC_020, complete genome                 | 1380 | 1380 | 99%  | 0.0 | 98% | <a href="#">CP012144.1</a> |
| Salmonella enterica strain MFDS1004024 chromosome, complete genome                                       | 1376 | 1376 | 100% | 0.0 | 98% | <a href="#">CP025745.1</a> |
| Salmonella enterica subsp. enterica serovar Saintpaul strain SGB23 chromosome, complete genome           | 1376 | 1376 | 100% | 0.0 | 98% | <a href="#">CP023166.1</a> |
| Salmonella enterica subsp. enterica serovar Hvittingfoss str. SA20014981 chromosome, complete genome     | 1376 | 1376 | 100% | 0.0 | 98% | <a href="#">CP022503.1</a> |
| Salmonella enterica subsp. enterica serovar Manhattan strain SA20084699 chromosome, complete genome      | 1376 | 1376 | 100% | 0.0 | 98% | <a href="#">CP022497.1</a> |
| Salmonella enterica subsp. enterica serovar Saintpaul strain SA20031783 chromosome, complete genome      | 1376 | 1376 | 100% | 0.0 | 98% | <a href="#">CP022491.1</a> |
| Salmonella enterica subsp. enterica serovar Braenderup strain SA20026289 chromosome, complete genome     | 1376 | 1376 | 100% | 0.0 | 98% | <a href="#">CP022490.1</a> |
| Salmonella enterica subsp. enterica serovar Yovokome str. S-1850, complete genome                        | 1376 | 1376 | 100% | 0.0 | 98% | <a href="#">CP019418.1</a> |
| Salmonella enterica subsp. enterica serovar Saintpaul strain CFSAN004174, complete genome                | 1376 | 1376 | 100% | 0.0 | 98% | <a href="#">CP019206.1</a> |
| Salmonella enterica subsp. enterica serovar Saintpaul strain CFSAN004173, complete genome                | 1376 | 1376 | 100% | 0.0 | 98% | <a href="#">CP019204.1</a> |
| Salmonella enterica subsp. enterica serovar Thompson strain CFSAN000738, complete genome                 | 1376 | 1376 | 100% | 0.0 | 98% | <a href="#">CP019196.1</a> |
| Salmonella enterica subsp. enterica serovar Saintpaul strain CFSAN004175, complete genome                | 1376 | 1376 | 100% | 0.0 | 98% | <a href="#">CP019172.1</a> |
| Salmonella enterica subsp. enterica serovar Stanleyville str. CFSAN000624 strain SARB61, complete genome | 1376 | 1376 | 100% | 0.0 | 98% | <a href="#">CP017723.1</a> |
| Salmonella enterica subsp. enterica serovar Thompson strain RM1986, complete genome                      | 1376 | 1376 | 100% | 0.0 | 98% | <a href="#">CP012514.1</a> |
| Salmonella enterica subsp. enterica serovar Thompson strain RM1984, complete genome                      | 1376 | 1376 | 100% | 0.0 | 98% | <a href="#">CP012513.1</a> |
| Salmonella enterica subsp. enterica serovar Choleraesuis str. ATCC 10708, complete genome                | 1376 | 1376 | 100% | 0.0 | 98% | <a href="#">CP012344.1</a> |
| Salmonella enterica subsp. enterica serovar Thompson str. ATCC 8391, complete genome                     | 1376 | 1376 | 100% | 0.0 | 98% | <a href="#">CP011396.1</a> |
| Salmonella enterica subsp. enterica serovar Thompson str. RM6836, complete genome                        | 1376 | 1376 | 100% | 0.0 | 98% | <a href="#">CP006717.1</a> |
| Salmonella enterica subsp. enterica serovar Paratyphi C strain RKS4594, complete                         | 1376 | 1376 | 100% | 0.0 | 98% | <a href="#">CP000857.1</a> |

|                                                                                                                  |      |      |      |     |     |                            |
|------------------------------------------------------------------------------------------------------------------|------|------|------|-----|-----|----------------------------|
| genome                                                                                                           |      |      |      |     |     |                            |
| Salmonella enterica subsp. enterica serovar Typhimurium strain AR_0031 chromosome, complete genome               | 1371 | 1371 | 100% | 0.0 | 98% | <a href="#">CP026700.1</a> |
| Salmonella enterica subsp. enterica serovar Typhimurium strain BL10 chromosome, complete genome                  | 1371 | 1371 | 100% | 0.0 | 98% | <a href="#">CP024619.1</a> |
| Salmonella enterica subsp. enterica serovar Enteritidis strain 92-0392 chromosome, complete genome               | 1371 | 1371 | 100% | 0.0 | 98% | <a href="#">CP018657.1</a> |
| Salmonella enterica subsp. enterica serovar Typhimurium isolate VNB151-sc-2315230 genome assembly, chromosome: 1 | 1371 | 1371 | 100% | 0.0 | 98% | <a href="#">LT795114.1</a> |
| Salmonella enterica subsp. enterica serovar Typhimurium strain WW012 chromosome, complete genome                 | 1371 | 1371 | 100% | 0.0 | 98% | <a href="#">CP022168.1</a> |
| Salmonella enterica subsp. enterica serovar Typhimurium strain TW-Stm6 chromosome, complete genome               | 1371 | 1371 | 100% | 0.0 | 98% | <a href="#">CP019649.1</a> |
| Salmonella enterica subsp. enterica serovar Typhimurium strain FDAARGOS_321, complete genome                     | 1371 | 1371 | 100% | 0.0 | 98% | <a href="#">CP022070.1</a> |
| Salmonella enterica strain FDAARGOS_312, complete genome                                                         | 1371 | 1371 | 100% | 0.0 | 98% | <a href="#">CP022062.1</a> |
| Salmonella enterica subsp. enterica strain ST1120, complete genome                                               | 1371 | 1371 | 100% | 0.0 | 98% | <a href="#">CP021909.1</a> |
| Salmonella enterica subsp. enterica strain 16A242, complete genome                                               | 1371 | 1371 | 100% | 0.0 | 98% | <a href="#">CP020922.1</a> |
| Salmonella enterica subsp. enterica serovar Typhimurium isolate STMU2UK genome assembly, chromosome: 1           | 1371 | 1371 | 100% | 0.0 | 98% | <a href="#">LT855376.1</a> |
| Salmonella enterica strain FORC_030, complete genome                                                             | 1371 | 1371 | 100% | 0.0 | 98% | <a href="#">CP015598.1</a> |
| Salmonella enterica subsp. enterica serovar Typhimurium strain RM10607, complete genome                          | 1371 | 1371 | 100% | 0.0 | 98% | <a href="#">CP013720.1</a> |
| Salmonella enterica subsp. enterica serovar Typhimurium str. USDA-ARS-USMARC-1899, complete genome               | 1371 | 1371 | 100% | 0.0 | 98% | <a href="#">CP007235.2</a> |
| Salmonella enterica subsp. enterica serovar Typhimurium str. USDA-ARS-USMARC-1898, complete genome               | 1371 | 1371 | 100% | 0.0 | 98% | <a href="#">CP014971.2</a> |
| Salmonella enterica subsp. enterica serovar Typhimurium str. CDC H2662, complete genome                          | 1371 | 1371 | 100% | 0.0 | 98% | <a href="#">CP014979.2</a> |
| Salmonella enterica subsp. enterica serovar Typhimurium str. USDA-ARS-USMARC-1810, complete genome               | 1371 | 1371 | 100% | 0.0 | 98% | <a href="#">CP014982.2</a> |
| Salmonella enterica subsp. enterica serovar Typhimurium strain 81741, complete genome                            | 1371 | 1371 | 100% | 0.0 | 98% | <a href="#">CP019442.1</a> |
| Salmonella enterica subsp. enterica serovar Dublin str. ATCC 39184, complete genome                              | 1371 | 1371 | 100% | 0.0 | 98% | <a href="#">CP019179.1</a> |
| Salmonella enterica subsp. enterica serovar Typhimurium strain RM10961, complete genome                          | 1371 | 1371 | 100% | 0.0 | 98% | <a href="#">CP013702.1</a> |
| Salmonella enterica subsp. enterica serovar Typhimurium strain 22792, complete genome                            | 1371 | 1371 | 100% | 0.0 | 98% | <a href="#">CP017621.1</a> |
| Salmonella enterica subsp. enterica serovar Typhimurium strain 22495, complete genome                            | 1371 | 1371 | 100% | 0.0 | 98% | <a href="#">CP017617.1</a> |
| Salmonella enterica subsp. enterica serovar Typhimurium str. SARA13, complete genome                             | 1371 | 1371 | 100% | 0.0 | 98% | <a href="#">CP017728.1</a> |
| Salmonella enterica subsp. enterica serovar Typhimurium strain 13-931, complete genome                           | 1371 | 1371 | 100% | 0.0 | 98% | <a href="#">CP016385.1</a> |

|                                                                                                          |      |      |      |     |     |                            |
|----------------------------------------------------------------------------------------------------------|------|------|------|-----|-----|----------------------------|
| Salmonella enterica subsp. enterica serovar Typhimurium strain NC983, complete genome                    | 1371 | 1371 | 100% | 0.0 | 98% | <a href="#">CP015157.1</a> |
| Salmonella enterica subsp. enterica strain SA972816, complete genome                                     | 1371 | 1371 | 100% | 0.0 | 98% | <a href="#">CP007484.1</a> |
| Salmonella enterica subsp. enterica serovar Typhimurium str. USDA-ARS-USMARC-1896, complete genome       | 1371 | 1371 | 100% | 0.0 | 98% | <a href="#">CP014977.1</a> |
| Salmonella enterica subsp. enterica serovar Typhimurium str. CDC 2009K-1640, complete genome             | 1371 | 1371 | 100% | 0.0 | 98% | <a href="#">CP014975.1</a> |
| Salmonella enterica subsp. enterica serovar Typhimurium str. USDA-ARS-USMARC-1808, complete genome       | 1371 | 1371 | 100% | 0.0 | 98% | <a href="#">CP014969.1</a> |
| Salmonella enterica subsp. enterica serovar Typhimurium str. CDC 2011K-1702, complete genome             | 1371 | 1371 | 100% | 0.0 | 98% | <a href="#">CP014967.1</a> |
| Salmonella enterica subsp. enterica serovar Typhimurium str. CDC 2010K-1587, complete genome             | 1371 | 1371 | 100% | 0.0 | 98% | <a href="#">CP014965.1</a> |
| Salmonella enterica subsp. enterica serovar Typhimurium str. CDC 2009K-2059, complete genome             | 1371 | 1371 | 100% | 0.0 | 98% | <a href="#">CP014983.1</a> |
| Salmonella enterica subsp. enterica serovar Typhimurium str. USDA-ARS-USMARC-1880, complete genome       | 1371 | 1371 | 100% | 0.0 | 98% | <a href="#">CP014981.1</a> |
| Salmonella enterica subsp. enterica serovar Typhimurium strain RM9437, complete genome                   | 1371 | 1371 | 100% | 0.0 | 98% | <a href="#">CP012985.1</a> |
| Salmonella enterica subsp. enterica serovar Typhimurium strain SL1344RX genome                           | 1371 | 1371 | 100% | 0.0 | 98% | <a href="#">CP011233.1</a> |
| Salmonella enterica subsp. enterica serovar Typhimurium strain YU15, complete genome                     | 1371 | 1371 | 100% | 0.0 | 98% | <a href="#">CP014358.1</a> |
| Salmonella enterica subsp. enterica serovar Typhimurium strain SO2, complete genome                      | 1371 | 1371 | 100% | 0.0 | 98% | <a href="#">CP014356.1</a> |
| Salmonella enterica subsp. enterica serovar Typhimurium strain SO3, complete genome                      | 1371 | 1371 | 100% | 0.0 | 98% | <a href="#">CP014536.1</a> |
| Salmonella enterica strain LT2, complete genome                                                          | 1371 | 1371 | 100% | 0.0 | 98% | <a href="#">CP014051.1</a> |
| Salmonella enterica subsp. enterica serovar Typhimurium isolate SO4698-09 genome assembly, chromosome: I | 1371 | 1371 | 100% | 0.0 | 98% | <a href="#">LN999997.1</a> |
| Salmonella enterica subsp. enterica serovar Typhimurium str. LT2, complete genome                        | 1371 | 1371 | 100% | 0.0 | 98% | <a href="#">AE006468.2</a> |
| Salmonella enterica subsp. enterica serovar Typhimurium strain 33676, complete genome                    | 1371 | 1371 | 100% | 0.0 | 98% | <a href="#">CP012681.1</a> |
| Salmonella enterica subsp. enterica strain YU39, complete genome                                         | 1371 | 1371 | 100% | 0.0 | 98% | <a href="#">CP011428.1</a> |
| Salmonella enterica subsp. enterica serovar Typhimurium str. CDC 2011K-0870, complete genome             | 1371 | 1371 | 100% | 0.0 | 98% | <a href="#">CP007523.1</a> |
| Salmonella enterica subsp. enterica serovar Typhimurium strain ATCC 13311, complete genome               | 1371 | 1371 | 100% | 0.0 | 98% | <a href="#">CP009102.1</a> |
| Salmonella enterica subsp. enterica serovar Choleraesuis strain C500, complete genome                    | 1371 | 1371 | 100% | 0.0 | 98% | <a href="#">CP007639.1</a> |
| Salmonella enterica subsp. enterica serovar Typhimurium strain VNP20009, complete genome                 | 1371 | 1371 | 100% | 0.0 | 98% | <a href="#">CP007804.2</a> |
| Salmonella enterica subsp. enterica serovar Dublin genome assembly SC50_1, chromosome : I                | 1371 | 1371 | 100% | 0.0 | 98% | <a href="#">LK931502.1</a> |
| Salmonella enterica subsp. enterica serovar Typhimurium str. L-3553 DNA, complete genome                 | 1371 | 1371 | 100% | 0.0 | 98% | <a href="#">AP014565.1</a> |
| Salmonella enterica subsp. enterica serovar                                                              |      |      |      |     |     |                            |



|                                                                                                                                                                                        |      |      |      |     |     |                            |
|----------------------------------------------------------------------------------------------------------------------------------------------------------------------------------------|------|------|------|-----|-----|----------------------------|
| Typhimurium strain 138736, complete genome                                                                                                                                             | 1371 | 1371 | 100% | 0.0 | 98% | <a href="#">CP007581.1</a> |
| Salmonella enterica subsp. enterica serovar Bovismorbificans str. 3114 complete genome                                                                                                 | 1371 | 1371 | 100% | 0.0 | 98% | <a href="#">HF969015.2</a> |
| Salmonella enterica subsp. enterica serovar Typhimurium str. DT2, complete genome                                                                                                      | 1371 | 1371 | 100% | 0.0 | 98% | <a href="#">HG326213.1</a> |
| Salmonella enterica subsp. enterica serovar Typhimurium DT104 main chromosome, complete genome                                                                                         | 1371 | 1371 | 100% | 0.0 | 98% | <a href="#">HF937208.1</a> |
| Salmonella enterica subsp. enterica serovar Typhimurium str. 08-1736, complete genome                                                                                                  | 1371 | 1371 | 100% | 0.0 | 98% | <a href="#">CP006602.1</a> |
| Salmonella enterica subsp. enterica serovar Typhimurium var. 5- str. CFSAN001921, complete genome                                                                                      | 1371 | 1371 | 100% | 0.0 | 98% | <a href="#">CP006048.1</a> |
| Salmonella enterica subsp. enterica serovar Typhimurium str. U288, complete genome                                                                                                     | 1371 | 1371 | 100% | 0.0 | 98% | <a href="#">CP003836.1</a> |
| Salmonella enterica subsp. enterica serovar Typhimurium str. 798, complete genome                                                                                                      | 1371 | 1371 | 100% | 0.0 | 98% | <a href="#">CP003386.1</a> |
| Salmonella enterica subsp. enterica serovar Typhimurium str. UK-1, complete genome                                                                                                     | 1371 | 1371 | 100% | 0.0 | 98% | <a href="#">CP002614.1</a> |
| Salmonella enterica subsp. enterica serovar Typhimurium str. ST4/74, complete genome                                                                                                   | 1371 | 1371 | 100% | 0.0 | 98% | <a href="#">CP002487.1</a> |
| Salmonella enterica subsp. enterica serovar Typhimurium str. T000240 DNA, complete genome                                                                                              | 1371 | 1371 | 100% | 0.0 | 98% | <a href="#">AP011957.1</a> |
| Salmonella enterica subsp. enterica serovar Typhimurium SL1344 complete genome                                                                                                         | 1371 | 1371 | 100% | 0.0 | 98% | <a href="#">FQ312003.1</a> |
| Salmonella enterica subsp. enterica serovar Typhimurium str. 14028S, complete genome                                                                                                   | 1371 | 1371 | 100% | 0.0 | 98% | <a href="#">CP001363.1</a> |
| Salmonella enterica subsp. enterica serovar Typhimurium str. D23580 complete genome                                                                                                    | 1371 | 1371 | 100% | 0.0 | 98% | <a href="#">FN424405.1</a> |
| Salmonella enterica subsp. enterica serovar Dublin str. CT_02021853, complete genome                                                                                                   | 1371 | 1371 | 100% | 0.0 | 98% | <a href="#">CP001144.1</a> |
| Salmonella enterica subsp. enterica serovar Paratyphi B str. SPB7, complete genome                                                                                                     | 1371 | 1371 | 100% | 0.0 | 98% | <a href="#">CP000886.1</a> |
| Salmonella typhimurium exonuclease VII (xseA), ShdA (shdA), RatC (ratC), RatB (ratB), RatA (ratA), SinI (sinI), and SinH (sinH) genes, complete cds; and YfgK (yfgK) gene, partial cds | 1371 | 1371 | 100% | 0.0 | 98% | <a href="#">AF140550.2</a> |
| Salmonella enterica subsp. enterica serovar Choleraesuis str. SC-B67, complete genome                                                                                                  | 1371 | 1371 | 100% | 0.0 | 98% | <a href="#">AE017220.1</a> |
| Salmonella enterica subsp. enterica serovar Saintpaul strain FDAARGOS_373 chromosome, complete genome                                                                                  | 1365 | 1365 | 100% | 0.0 | 98% | <a href="#">CP023512.1</a> |
| Salmonella enterica subsp. enterica serovar Java strain NCTC5706 genome assembly, chromosome: 1                                                                                        | 1365 | 1365 | 100% | 0.0 | 98% | <a href="#">LT571437.1</a> |
| Salmonella enterica subsp. enterica strain 08-00436, complete genome                                                                                                                   | 1256 | 1256 | 99%  | 0.0 | 95% | <a href="#">CP020492.1</a> |
| Salmonella enterica subsp. enterica serovar Senftenberg strain N17-509 chromosome, complete genome                                                                                     | 1249 | 1249 | 100% | 0.0 | 95% | <a href="#">CP026379.1</a> |
| Salmonella enterica subsp. enterica serovar Mbandaka strain SA20026234 chromosome, complete genome                                                                                     | 1249 | 1249 | 100% | 0.0 | 95% | <a href="#">CP022489.1</a> |
| Salmonella enterica subsp. enterica serovar Senftenberg strain 775W, complete genome                                                                                                   | 1249 | 1249 | 100% | 0.0 | 95% | <a href="#">CP016837.1</a> |
| Salmonella enterica subsp. enterica serovar Senftenberg str. ATCC 43845, complete genome                                                                                               | 1249 | 1249 | 100% | 0.0 | 95% | <a href="#">CP019194.1</a> |
| Salmonella enterica subsp. enterica serovar Typhimurium strain FORC_015, complete genome                                                                                               | 1249 | 1249 | 100% | 0.0 | 95% | <a href="#">CP011365.1</a> |

|                                                                                                      |      |      |      |     |     |                            |
|------------------------------------------------------------------------------------------------------|------|------|------|-----|-----|----------------------------|
| Salmonella enterica subsp. enterica serovar Ouakam str. SA20034636, complete genome                  | 1236 | 1236 | 99%  | 0.0 | 95% | <a href="#">CP022116.1</a> |
| Salmonella enterica subsp. enterica serovar Inverness str. ATCC 10720, complete genome               | 1236 | 1236 | 99%  | 0.0 | 95% | <a href="#">CP019181.1</a> |
| Salmonella enterica subsp. enterica serovar Ouakam strain GNT-01 genome                              | 1236 | 1236 | 99%  | 0.0 | 95% | <a href="#">CP012038.1</a> |
| Salmonella enterica subsp. enterica serovar Hayindogo strain CFSAN050752 chromosome, complete genome | 1230 | 1230 | 99%  | 0.0 | 95% | <a href="#">CP017719.1</a> |
| Salmonella enterica subsp. enterica serovar Anatum str. USDA-ARS-USMARC-1781, complete genome        | 1230 | 1230 | 99%  | 0.0 | 95% | <a href="#">CP014666.2</a> |
| Salmonella enterica subsp. enterica serovar Anatum str. CDC 06-0532, complete genome                 | 1230 | 1230 | 99%  | 0.0 | 95% | <a href="#">CP007211.2</a> |
| Salmonella enterica subsp. enterica serovar Anatum str. USDA-ARS-USMARC-1735, complete genome        | 1230 | 1230 | 99%  | 0.0 | 95% | <a href="#">CP007584.2</a> |
| Salmonella enterica subsp. enterica serovar Anatum str. ATCC BAA-1592, complete genome               | 1230 | 1230 | 99%  | 0.0 | 95% | <a href="#">CP007531.1</a> |
| Salmonella enterica subsp. enterica serovar Krefeld str. SA20030536, complete genome                 | 1229 | 1229 | 99%  | 0.0 | 95% | <a href="#">CP019413.1</a> |
| Salmonella enterica subsp. enterica serovar Anatum str. USDA-ARS-USMARC-1765, complete genome        | 1225 | 1225 | 99%  | 0.0 | 95% | <a href="#">CP014659.2</a> |
| Salmonella enterica subsp. enterica serovar Anatum str. USDA-ARS-USMARC-1677, complete genome        | 1225 | 1225 | 99%  | 0.0 | 95% | <a href="#">CP014663.2</a> |
| Salmonella enterica subsp. enterica serovar Anatum str. USDA-ARS-USMARC-1175, complete genome        | 1225 | 1225 | 99%  | 0.0 | 95% | <a href="#">CP007483.2</a> |
| Salmonella enterica subsp. enterica serovar Anatum str. USDA-ARS-USMARC-1727, complete genome        | 1225 | 1225 | 99%  | 0.0 | 95% | <a href="#">CP014621.2</a> |
| Salmonella enterica subsp. enterica serovar Borreze str. SA20041063, complete genome                 | 1225 | 1225 | 99%  | 0.0 | 95% | <a href="#">CP019407.1</a> |
| Salmonella enterica subsp. enterica serovar Anatum str. USDA-ARS-USMARC-1766, complete genome        | 1225 | 1225 | 99%  | 0.0 | 95% | <a href="#">CP014665.1</a> |
| Salmonella enterica subsp. enterica serovar Anatum str. USDA-ARS-USMARC-1728, complete genome        | 1225 | 1225 | 99%  | 0.0 | 95% | <a href="#">CP014664.1</a> |
| Salmonella enterica subsp. enterica serovar Anatum str. USDA-ARS-USMARC-1783, complete sequence      | 1225 | 1225 | 99%  | 0.0 | 95% | <a href="#">CP014661.1</a> |
| Salmonella enterica subsp. enterica serovar Anatum str. USDA-ARS-USMARC-1736, complete genome        | 1225 | 1225 | 99%  | 0.0 | 95% | <a href="#">CP014657.1</a> |
| Salmonella enterica subsp. enterica serovar Anatum str. USDA-ARS-USMARC-1676, complete genome        | 1225 | 1225 | 99%  | 0.0 | 95% | <a href="#">CP014620.1</a> |
| Salmonella enterica subsp. enterica serovar Agona str. 392869-2, complete genome                     | 1225 | 1225 | 99%  | 0.0 | 95% | <a href="#">CP015024.1</a> |
| Salmonella enterica subsp. enterica serovar Anatum strain GT-38, complete genome                     | 1225 | 1225 | 99%  | 0.0 | 95% | <a href="#">CP013226.1</a> |
| Salmonella enterica subsp. enterica serovar Anatum strain GT-01, complete genome                     | 1225 | 1225 | 99%  | 0.0 | 95% | <a href="#">CP013222.1</a> |
| Salmonella enterica subsp. enterica serovar Agona str. 460004 2-1, complete genome                   | 1225 | 1225 | 99%  | 0.0 | 95% | <a href="#">CP011259.1</a> |
| Salmonella enterica subsp. enterica serovar Agona str. 24249, complete genome                        | 1225 | 1225 | 99%  | 0.0 | 95% | <a href="#">CP006876.1</a> |
| Salmonella enterica subsp. enterica serovar Agona str. SL483, complete genome                        | 1225 | 1225 | 99%  | 0.0 | 95% | <a href="#">CP001138.1</a> |
| Salmonella enterica subsp. enterica serovar Senftenberg genome assembly NCTC10384,                   | 1221 | 1221 | 100% | 0.0 | 94% | <a href="#">LN868943.1</a> |

|                                                                                                      |      |      |      |     |     |                            |
|------------------------------------------------------------------------------------------------------|------|------|------|-----|-----|----------------------------|
| chromosome : 1                                                                                       |      |      |      |     |     |                            |
| Salmonella enterica strain FDAARGOS_313, complete genome                                             | 1219 | 1219 | 99%  | 0.0 | 95% | <a href="#">CP022069.1</a> |
| Salmonella enterica subsp. enterica serovar Kentucky str. SA20030505 chromosome, complete genome     | 1210 | 1210 | 100% | 0.0 | 94% | <a href="#">CP022500.1</a> |
| Salmonella enterica subsp. enterica serovar Derby isolate 2014LSAL01779 chromosome, complete genome  | 1205 | 1205 | 100% | 0.0 | 94% | <a href="#">CP026609.1</a> |
| Salmonella enterica strain FORC_038, complete genome                                                 | 1205 | 1205 | 100% | 0.0 | 94% | <a href="#">CP015574.1</a> |
| Salmonella enterica subsp. enterica serovar Apapa str. SA20060561, complete genome                   | 1203 | 1203 | 99%  | 0.0 | 94% | <a href="#">CP019403.1</a> |
| Salmonella enterica subsp. enterica serovar Kentucky strain PU131 chromosome, complete genome        | 1199 | 1199 | 100% | 0.0 | 94% | <a href="#">CP026327.1</a> |
| Salmonella enterica subsp. enterica serovar Infantis strain CFSAN003307 chromosome, complete genome  | 1199 | 1199 | 100% | 0.0 | 94% | <a href="#">CP019202.1</a> |
| Salmonella enterica subsp. enterica serovar Infantis strain N55391, complete genome                  | 1199 | 1199 | 100% | 0.0 | 94% | <a href="#">CP016410.1</a> |
| Salmonella enterica subsp. enterica serovar Infantis strain FSIS1502916, complete genome             | 1199 | 1199 | 100% | 0.0 | 94% | <a href="#">CP016408.1</a> |
| Salmonella enterica subsp. enterica serovar Infantis strain FSIS1502169, complete genome             | 1199 | 1199 | 100% | 0.0 | 94% | <a href="#">CP016406.1</a> |
| Salmonella enterica subsp. enterica serovar Infantis strain CVM44454, complete genome                | 1199 | 1199 | 100% | 0.0 | 94% | <a href="#">CP016412.1</a> |
| Salmonella enterica subsp. enterica serovar Infantis genome assembly SINFA, chromosome : 1           | 1199 | 1199 | 100% | 0.0 | 94% | <a href="#">LN649235.1</a> |
| Salmonella enterica strain CFSAN024439 chromosome, complete genome                                   | 1197 | 1197 | 99%  | 0.0 | 94% | <a href="#">CP024169.1</a> |
| Salmonella enterica subsp. enterica serovar Tennessee strain CFSAN070643 chromosome, complete genome | 1197 | 1197 | 99%  | 0.0 | 94% | <a href="#">CP024168.1</a> |
| Salmonella enterica subsp. enterica serovar Tennessee strain CFSAN070645 chromosome, complete genome | 1197 | 1197 | 99%  | 0.0 | 94% | <a href="#">CP024164.1</a> |
| Salmonella enterica subsp. enterica serovar Albany str. ATCC 51960, complete genome                  | 1197 | 1197 | 99%  | 0.0 | 94% | <a href="#">CP019177.1</a> |
| Salmonella enterica subsp. enterica serovar Tennessee strain CFSAN001387, complete genome            | 1197 | 1197 | 99%  | 0.0 | 94% | <a href="#">CP014994.1</a> |
| Salmonella enterica subsp. enterica serovar Tennessee str. TXSC_TXSC08-19, complete genome           | 1197 | 1197 | 99%  | 0.0 | 94% | <a href="#">CP007505.1</a> |
| Salmonella enterica subsp. enterica Serovar Cubana str. CFSAN002050, complete genome                 | 1197 | 1197 | 99%  | 0.0 | 94% | <a href="#">CP006055.1</a> |
| Salmonella enterica subsp. enterica serovar Bergen str. ST350, complete genome                       | 1194 | 1194 | 100% | 0.0 | 94% | <a href="#">CP019405.1</a> |
| Salmonella enterica subsp. enterica serovar Derby strain SA20035215 chromosome, complete genome      | 1186 | 1186 | 99%  | 0.0 | 94% | <a href="#">CP022494.1</a> |
| Salmonella enterica subsp. enterica serovar Hillingdon str. N1529-D3, complete genome                | 1131 | 1131 | 95%  | 0.0 | 94% | <a href="#">CP019410.1</a> |
| Salmonella enterica subsp. enterica serovar Weltevreden str. 1655, complete genome                   | 1092 | 1092 | 97%  | 0.0 | 92% | <a href="#">CP014996.1</a> |
| Salmonella enterica subsp. enterica serovar Weltevreden genome assembly 99_3134, chromosome : 1      | 1092 | 1092 | 97%  | 0.0 | 92% | <a href="#">LN890524.1</a> |
| Salmonella enterica subsp. enterica serovar Weltevreden genome assembly 98_11262, chromosome : 1     | 1092 | 1092 | 97%  | 0.0 | 92% | <a href="#">LN890522.1</a> |
| Salmonella enterica subsp. enterica serovar Weltevreden genome assembly C2346,                       | 1092 | 1092 | 97%  | 0.0 | 92% | <a href="#">LN890520.1</a> |

|                                                                                                                         |      |      |     |     |     |                            |
|-------------------------------------------------------------------------------------------------------------------------|------|------|-----|-----|-----|----------------------------|
| chromosome : 1                                                                                                          |      |      |     |     |     |                            |
| Salmonella enterica subsp. enterica serovar Weltevreden genome assembly 10259, chromosome : 1                           | 1092 | 1092 | 97% | 0.0 | 92% | <a href="#">LN890518.1</a> |
| Salmonella enterica subsp. enterica serovar Weltevreden str. 2007-60-3289-1 complete genome, contig 43                  | 1092 | 1092 | 97% | 0.0 | 92% | <a href="#">FR775230.1</a> |
| Salmonella enterica subsp. enterica serovar Paratyphi A strain FDAARGOS_368 chromosome, complete genome                 | 1031 | 1031 | 97% | 0.0 | 91% | <a href="#">CP023508.1</a> |
| Salmonella enterica subsp. enterica serovar Paratyphi A str. ATCC 11511, complete genome                                | 1031 | 1031 | 97% | 0.0 | 91% | <a href="#">CP019185.1</a> |
| Salmonella enterica subsp. enterica serovar Paratyphi A strain CMCC50093 genome                                         | 1031 | 1031 | 97% | 0.0 | 91% | <a href="#">CP011967.1</a> |
| Salmonella enterica subsp. enterica serovar Paratyphi A strain CMCC 50973, complete genome                              | 1031 | 1031 | 97% | 0.0 | 91% | <a href="#">CP009049.1</a> |
| Salmonella enterica subsp. enterica serovar Paratyphi A strain CMCC 50503, complete genome                              | 1031 | 1031 | 97% | 0.0 | 91% | <a href="#">CP009559.1</a> |
| Salmonella enterica subsp. enterica serovar Paratyphi A str. AKU_12601 complete genome, strain AKU_12601                | 1031 | 1031 | 97% | 0.0 | 91% | <a href="#">FM200053.1</a> |
| Salmonella enterica subsp. enterica serovar Paratyphi A str. ATCC 9150, complete genome                                 | 1031 | 1031 | 97% | 0.0 | 91% | <a href="#">CP000026.1</a> |
| Salmonella enterica subsp. enterica serovar Saintpaul str. SARA26, complete genome                                      | 1009 | 1009 | 97% | 0.0 | 90% | <a href="#">CP017727.1</a> |
| Salmonella enterica subsp. enterica serovar Mbandaka str. ATCC 51958, complete genome                                   | 992  | 992  | 99% | 0.0 | 89% | <a href="#">CP019183.1</a> |
| Salmonella enterica subsp. enterica serovar Typhi strain SGB90 genome assembly, chromosome: 1                           | 987  | 987  | 97% | 0.0 | 90% | <a href="#">LT904870.2</a> |
| Salmonella enterica subsp. enterica serovar Typhi strain SGB89 genome assembly, chromosome: 1                           | 987  | 987  | 97% | 0.0 | 90% | <a href="#">LT904882.1</a> |
| Salmonella enterica subsp. enterica serovar Typhi strain OVG_041 genome assembly, chromosome: 2                         | 981  | 981  | 97% | 0.0 | 90% | <a href="#">LT906560.1</a> |
| Salmonella enterica subsp. enterica serovar Typhi isolate ISP_03_07467_SGB110-sc-1979083 genome assembly, chromosome: 1 | 981  | 981  | 97% | 0.0 | 90% | <a href="#">LT905060.2</a> |
| Salmonella enterica subsp. enterica serovar Typhi strain 1036491 genome assembly, chromosome: 1                         | 981  | 981  | 97% | 0.0 | 90% | <a href="#">LT906495.1</a> |
| Salmonella enterica subsp. enterica serovar Typhi strain ERL024120 genome assembly, chromosome: 1                       | 981  | 981  | 97% | 0.0 | 90% | <a href="#">LT906494.1</a> |
| Salmonella enterica subsp. enterica serovar Typhi isolate 1554-sc-2165329 genome assembly, chromosome: 1                | 981  | 981  | 97% | 0.0 | 90% | <a href="#">LT906493.1</a> |
| Salmonella enterica subsp. enterica serovar Typhi isolate E98_3139-sc-1927833 genome assembly, chromosome: 1            | 981  | 981  | 97% | 0.0 | 90% | <a href="#">LT905143.1</a> |
| Salmonella enterica subsp. enterica serovar Typhi strain H12ESR00755-001A genome assembly, chromosome: 1                | 981  | 981  | 97% | 0.0 | 90% | <a href="#">LT905142.1</a> |
| Salmonella enterica subsp. enterica serovar Typhi strain OVG_041 genome assembly, chromosome: 1                         | 981  | 981  | 97% | 0.0 | 90% | <a href="#">LT905141.1</a> |
| Salmonella enterica subsp. enterica serovar Typhi strain ERL082356 genome assembly, chromosome: 1                       | 981  | 981  | 97% | 0.0 | 90% | <a href="#">LT905140.1</a> |
| Salmonella enterica subsp. enterica serovar Typhi strain 2010-007898 genome assembly, chromosome: 1                     | 981  | 981  | 97% | 0.0 | 90% | <a href="#">LT905139.1</a> |

|                                                                                                                  |     |     |     |     |     |                            |
|------------------------------------------------------------------------------------------------------------------|-----|-----|-----|-----|-----|----------------------------|
| Salmonella enterica subsp. enterica serovar Typhi strain ty3-243 genome assembly, chromosome: 2                  | 981 | 981 | 97% | 0.0 | 90% | <a href="#">LT905090.1</a> |
| Salmonella enterica subsp. enterica serovar Typhi strain ERL024120 genome assembly, chromosome: 1                | 981 | 981 | 97% | 0.0 | 90% | <a href="#">LT905088.1</a> |
| Salmonella enterica subsp. enterica serovar Typhi isolate 1554-sc-2165329 genome assembly, chromosome: 1         | 981 | 981 | 97% | 0.0 | 90% | <a href="#">LT905064.1</a> |
| Salmonella enterica subsp. enterica serovar Typhi isolate lupe_GEN0059-sc-1979081 genome assembly, chromosome: 1 | 981 | 981 | 97% | 0.0 | 90% | <a href="#">LT905063.1</a> |
| Salmonella enterica subsp. enterica serovar Typhi isolate 403Ty-sc-1979084 genome assembly, chromosome: 1        | 981 | 981 | 97% | 0.0 | 90% | <a href="#">LT905062.1</a> |
| Salmonella enterica subsp. enterica serovar Typhi strain ERL12960 genome assembly, chromosome: 1                 | 981 | 981 | 97% | 0.0 | 90% | <a href="#">LT904894.1</a> |
| Salmonella enterica subsp. enterica serovar Typhi strain 1016889 genome assembly, chromosome: 1                  | 981 | 981 | 97% | 0.0 | 90% | <a href="#">LT904893.1</a> |
| Salmonella enterica subsp. enterica serovar Typhi strain 80-2002 genome assembly, chromosome: 1                  | 981 | 981 | 97% | 0.0 | 90% | <a href="#">LT904891.1</a> |
| Salmonella enterica subsp. enterica serovar Typhi strain H12ESR00394-001A genome assembly, chromosome: 1         | 981 | 981 | 97% | 0.0 | 90% | <a href="#">LT904890.1</a> |
| Salmonella enterica subsp. enterica serovar Typhi strain 129-0238-M genome assembly, chromosome: 1               | 981 | 981 | 97% | 0.0 | 90% | <a href="#">LT904888.1</a> |
| Salmonella enterica subsp. enterica serovar Typhi strain 76-1292 genome assembly, chromosome: 1                  | 981 | 981 | 97% | 0.0 | 90% | <a href="#">LT904887.1</a> |
| Salmonella enterica subsp. enterica serovar Typhi strain SGB82 genome assembly, chromosome: 1                    | 981 | 981 | 97% | 0.0 | 90% | <a href="#">LT904886.1</a> |
| Salmonella enterica subsp. enterica serovar Typhi strain 1036491 genome assembly, chromosome: 1                  | 981 | 981 | 97% | 0.0 | 90% | <a href="#">LT904885.1</a> |
| Salmonella enterica subsp. enterica serovar Typhi strain ERL041834 genome assembly, chromosome: 1                | 981 | 981 | 97% | 0.0 | 90% | <a href="#">LT904884.1</a> |
| Salmonella enterica subsp. enterica serovar Typhi strain ERL103914 genome assembly, chromosome: 1                | 981 | 981 | 97% | 0.0 | 90% | <a href="#">LT904883.1</a> |
| Salmonella enterica subsp. enterica serovar Typhi strain UI2120 genome assembly, chromosome: 1                   | 981 | 981 | 97% | 0.0 | 90% | <a href="#">LT904881.1</a> |
| Salmonella enterica subsp. enterica serovar Typhi strain ty3-193 genome assembly, chromosome: 1                  | 981 | 981 | 97% | 0.0 | 90% | <a href="#">LT904878.1</a> |
| Salmonella enterica subsp. enterica serovar Typhi strain SGB92 genome assembly, chromosome: 1                    | 981 | 981 | 97% | 0.0 | 90% | <a href="#">LT904877.1</a> |
| Salmonella enterica subsp. enterica serovar Typhi strain ERL114000 genome assembly, chromosome: 1                | 981 | 981 | 97% | 0.0 | 90% | <a href="#">LT904876.1</a> |
| Salmonella enterica subsp. enterica serovar Typhi strain ERL024919 genome assembly, chromosome: 1                | 981 | 981 | 97% | 0.0 | 90% | <a href="#">LT904875.1</a> |
| Salmonella enterica subsp. enterica serovar Typhi strain ERL11909 genome assembly, chromosome: 1                 | 981 | 981 | 97% | 0.0 | 90% | <a href="#">LT904872.1</a> |
| Salmonella enterica subsp. enterica serovar Typhi strain 1553 genome assembly, chromosome: 1                     | 981 | 981 | 97% | 0.0 | 90% | <a href="#">LT904871.1</a> |
| Salmonella enterica subsp. enterica serovar Typhi strain ERL052042 genome assembly, chromosome: 1                | 981 | 981 | 97% | 0.0 | 90% | <a href="#">LT904869.1</a> |
| Salmonella enterica subsp. enterica serovar                                                                      |     |     |     |     |     |                            |

|                                                                                                              |     |     |     |     |     |                            |
|--------------------------------------------------------------------------------------------------------------|-----|-----|-----|-----|-----|----------------------------|
| Typhi strain H12ESR04734-001A genome assembly, chromosome: 1                                                 | 981 | 981 | 97% | 0.0 | 90% | <a href="#">LT904868.1</a> |
| Salmonella enterica subsp. enterica serovar Typhi strain ERL034151 genome assembly, chromosome: 1            | 981 | 981 | 97% | 0.0 | 90% | <a href="#">LT904867.1</a> |
| Salmonella enterica subsp. enterica serovar Typhi strain M223 genome assembly, chromosome: 1                 | 981 | 981 | 97% | 0.0 | 90% | <a href="#">LT904854.1</a> |
| Salmonella enterica subsp. enterica serovar Typhi strain TY585 genome assembly, chromosome: 1                | 981 | 981 | 97% | 0.0 | 90% | <a href="#">LT904852.1</a> |
| Salmonella enterica subsp. enterica serovar Typhi strain ERL072973 genome assembly, chromosome: 1            | 981 | 981 | 97% | 0.0 | 90% | <a href="#">LT904777.1</a> |
| Salmonella enterica subsp. enterica serovar Waycross strain SA20041608, complete genome                      | 981 | 981 | 97% | 0.0 | 89% | <a href="#">CP022138.1</a> |
| Salmonella enterica subsp. enterica serovar Typhi strain ERL12148 genome assembly, chromosome: 1             | 981 | 981 | 97% | 0.0 | 90% | <a href="#">LT883153.1</a> |
| Salmonella enterica subsp. enterica serovar Typhi strain BL60006 genome assembly, chromosome: 1              | 981 | 981 | 97% | 0.0 | 90% | <a href="#">LT882486.1</a> |
| Salmonella enterica subsp. enterica serovar Typhi strain B/SF/13/03/195, complete genome                     | 981 | 981 | 97% | 0.0 | 90% | <a href="#">CP012151.1</a> |
| Salmonella enterica subsp. enterica serovar Typhi strain PM016/13, complete genome                           | 981 | 981 | 97% | 0.0 | 90% | <a href="#">CP012091.1</a> |
| Salmonella enterica subsp. enterica serovar Typhi str. CT18, complete chromosome                             | 981 | 981 | 97% | 0.0 | 90% | <a href="#">AL513382.1</a> |
| Salmonella enterica subsp. enterica serovar Typhi str. Ty21a, complete genome                                | 981 | 981 | 97% | 0.0 | 90% | <a href="#">CP002099.1</a> |
| Salmonella enterica subsp. enterica serovar Typhi str. P-stx-12, complete genome                             | 981 | 981 | 97% | 0.0 | 90% | <a href="#">CP003278.1</a> |
| Salmonella enterica subsp. enterica serovar Typhi Ty2, complete genome                                       | 981 | 981 | 97% | 0.0 | 90% | <a href="#">AE014613.1</a> |
| Salmonella enterica subsp. enterica serovar Cerro strain 87, complete genome                                 | 970 | 970 | 97% | 0.0 | 89% | <a href="#">CP008925.1</a> |
| Salmonella enterica subsp. enterica serovar Cerro str. CFSAN001588, complete genome                          | 970 | 970 | 97% | 0.0 | 89% | <a href="#">CP012833.1</a> |
| Salmonella enterica subsp. enterica serovar Djakarta str. S-1087, complete genome                            | 966 | 966 | 97% | 0.0 | 89% | <a href="#">CP019409.1</a> |
| Salmonella enterica subsp. enterica serovar Manchester str. ST278, complete genome                           | 948 | 948 | 97% | 0.0 | 89% | <a href="#">CP019414.1</a> |
| Salmonella enterica subsp. enterica serovar Muenster str. 420 strain CFSAN001301 chromosome, complete genome | 861 | 861 | 97% | 0.0 | 87% | <a href="#">CP019201.1</a> |
| Salmonella enterica subsp. enterica serovar Muenster str. 0315 strain 315, complete genome                   | 861 | 861 | 97% | 0.0 | 87% | <a href="#">CP019198.1</a> |
| Salmonella enterica subsp. enterica serovar Minnesota strain CFSAN017963, complete genome                    | 856 | 856 | 97% | 0.0 | 87% | <a href="#">CP017720.1</a> |
| Salmonella enterica subsp. enterica serovar Montevideo str. USDA-ARS-USMARC-1921, complete genome            | 856 | 856 | 97% | 0.0 | 87% | <a href="#">CP007540.2</a> |
| Salmonella enterica subsp. enterica serovar Chester str. ATCC 11997, complete genome                         | 856 | 856 | 97% | 0.0 | 87% | <a href="#">CP019178.1</a> |
| Salmonella enterica subsp. enterica serovar Montevideo str. USDA-ARS-USMARC-1903, complete genome            | 856 | 856 | 97% | 0.0 | 87% | <a href="#">CP007222.1</a> |
| Salmonella enterica subsp. enterica serovar Bredeney str. CFSAN001080, complete genome                       | 856 | 856 | 97% | 0.0 | 87% | <a href="#">CP007533.1</a> |
| Salmonella enterica subsp. enterica serovar Montevideo str. 507440-20, complete genome                       | 856 | 856 | 97% | 0.0 | 87% | <a href="#">CP007530.1</a> |



|                                                                                                                  |     |     |     |     |     |                            |
|------------------------------------------------------------------------------------------------------------------|-----|-----|-----|-----|-----|----------------------------|
| Salmonella enterica subsp. enterica serovar Schwarzengrund str. CVM19633, complete genome                        | 856 | 856 | 97% | 0.0 | 87% | <a href="#">CP001127.1</a> |
| Salmonella enterica subsp. enterica serovar Poona str. ATCC BAA-1673 chromosome, complete genome                 | 850 | 850 | 97% | 0.0 | 87% | <a href="#">CP019189.1</a> |
| Salmonella enterica subsp. enterica serovar Pomona str. ATCC 10729 chromosome, complete genome                   | 850 | 850 | 97% | 0.0 | 87% | <a href="#">CP019186.1</a> |
| Salmonella enterica subsp. enterica serovar Give strain CFSAN024229 chromosome, complete genome                  | 850 | 850 | 97% | 0.0 | 87% | <a href="#">CP019174.1</a> |
| Salmonella enterica subsp. enterica strain 2012K-0678, genome                                                    | 850 | 850 | 97% | 0.0 | 87% | <a href="#">CP020718.1</a> |
| Salmonella enterica subsp. enterica serovar Minnesota str. ATCC 49284, complete genome                           | 850 | 850 | 97% | 0.0 | 87% | <a href="#">CP019184.1</a> |
| Salmonella enterica subsp. enterica serovar Oranienburg str. 0250 strain CFSAN001285 chromosome, complete genome | 845 | 845 | 97% | 0.0 | 86% | <a href="#">CP019197.1</a> |
| Salmonella enterica subsp. enterica serovar Gaminara strain CFSAN070644 chromosome, complete genome              | 845 | 845 | 97% | 0.0 | 86% | <a href="#">CP024165.1</a> |
| Salmonella enterica subsp. enterica serovar Onderstepoort str. SA20060086, complete genome                       | 845 | 845 | 97% | 0.0 | 86% | <a href="#">CP022034.1</a> |
| Salmonella enterica subsp. enterica serovar Johannesburg str. ST203, complete genome                             | 845 | 845 | 97% | 0.0 | 86% | <a href="#">CP019411.1</a> |
| Salmonella enterica subsp. enterica strain RM11065 chromosome, complete genome                                   | 839 | 839 | 97% | 0.0 | 86% | <a href="#">CP022663.1</a> |
| Salmonella enterica subsp. enterica serovar Quebec str. S-1267, complete genome                                  | 839 | 839 | 97% | 0.0 | 86% | <a href="#">CP022019.1</a> |
| Salmonella enterica subsp. enterica serovar Antsalova str. S01-0511, complete genome                             | 839 | 839 | 97% | 0.0 | 86% | <a href="#">CP019116.1</a> |
| Salmonella enterica subsp. enterica serovar Abaetetuba str. ATCC 35640, complete genome                          | 839 | 839 | 97% | 0.0 | 86% | <a href="#">CP007532.1</a> |
| Salmonella enterica subsp. enterica serovar India str. SA20085604, complete genome                               | 833 | 833 | 97% | 0.0 | 86% | <a href="#">CP022015.1</a> |
| Salmonella enterica subsp. enterica serovar Koessen str. S-1501, complete genome                                 | 833 | 833 | 97% | 0.0 | 86% | <a href="#">CP019412.1</a> |
| Salmonella enterica subsp. enterica serovar Panama str. ATCC 7378, complete genome                               | 833 | 833 | 97% | 0.0 | 86% | <a href="#">CP012346.1</a> |
| Salmonella enterica subsp. enterica serovar Rubislaw str. ATCC 10717, complete genome                            | 828 | 828 | 97% | 0.0 | 86% | <a href="#">CP019192.1</a> |
| Salmonella enterica subsp. enterica serovar Javiana str. CFSAN001992, complete genome                            | 822 | 822 | 97% | 0.0 | 86% | <a href="#">CP004027.1</a> |
| Salmonella enterica subsp. enterica serovar Sloterdijk str. ATCC 15791, complete genome                          | 795 | 795 | 97% | 0.0 | 85% | <a href="#">CP012349.1</a> |
| Salmonella enterica subsp. enterica serovar Indiana strain D90, complete genome                                  | 688 | 688 | 66% | 0.0 | 90% | <a href="#">CP022450.1</a> |
| Salmonella enterica strain C629, complete genome                                                                 | 688 | 688 | 66% | 0.0 | 90% | <a href="#">CP015724.1</a> |

## Alignments

Salmonella enterica strain MFDS1004839 chromosome, complete genome

Sequence ID: **CP026569.1** Length: 4679649 Number of Matches: 1

Range 1: 1273425 to 1274214

| Score          | Expect | Identities    | Gaps      | Strand     | Frame |
|----------------|--------|---------------|-----------|------------|-------|
| 1459 bits(790) | 0.0()  | 790/790(100%) | 0/790(0%) | Plus/Minus |       |

## Features:

|       |         |                                                               |         |
|-------|---------|---------------------------------------------------------------|---------|
| Query | 1       | AATGCTGTGAATCTTGCCGCCGCTGTTGGCGTTATACAGCGCCTCAAGCTGGTCGATGCG  | 60      |
| Sbjct | 1274214 | AATGCTGTGAATCTTGCCGCCGCTGTTGGCGTTATACAGCGCCTCAAGCTGGTCGATGCG  | 1274155 |
| Query | 61      | CGGCAGGCGGTTGCGCCGCGAGCCGCCCGCATCCGGGTTGCCACCGCGTCGCTATGGGC   | 120     |
| Sbjct | 1274154 | CGGCAGGCGGTTGCGCCGCGAGCCGCCCGCATCCGGGTTGCCACCGCGTCGCTATGGGC   | 1274095 |
| Query | 121     | CACGCGCGCCAGGTCTCATTGCTCTCGTCTGGGTACGCAGCGGGTTGCTCACTTCACC    | 180     |
| Sbjct | 1274094 | CACGCGCGCCAGGTCTCATTGCTCTCGTCTGGGTACGCAGCGGGTTGCTCACTTCACC    | 1274035 |
| Query | 181     | CGCCAGTTTGGGCCGCTCAAAAGTCCAGTCGCCACGGTAATCGTGTGGCCATATGGCC    | 240     |
| Sbjct | 1274034 | CGCCAGTTTGGGCCGCTCAAAAGTCCAGTCGCCACGGTAATCGTGTGGCCATATGGCC    | 1273975 |
| Query | 241     | CCACATTTTGGCTTTTGCCGTATCCGGGCTGGTCGCGACGGTAAACTTCACGCTGCGGGA  | 300     |
| Sbjct | 1273974 | CCACATTTTGGCTTTTGCCGTATCCGGGCTGGTCGCGACGGTAAACTTCACGCTGCGGGA  | 1273915 |
| Query | 301     | AACCGGCGTATTGATGTATGAATTGACGGGCACGATGCTTAACGGCGTCAGCAGCCCCAC  | 360     |
| Sbjct | 1273914 | AACCGGCGTATTGATGTATGAATTGACGGGCACGATGCTTAACGGCGTCAGCAGCCCCAC  | 1273855 |
| Query | 361     | GCCCTTTTCTGGGTGAGGATAATGGTCGCATCGCCGTTAGCGTCGGTGATCCCGTGATA   | 420     |
| Sbjct | 1273854 | GCCCTTTTCTGGGTGAGGATAATGGTCGCATCGCCGTTAGCGTCGGTGATCCCGTGATA   | 1273795 |
| Query | 421     | AACCTGCCCGGCAACGTAGCCACGTCGTCAAACCTGCATCTCGCCGTTGCTGGTATCGGT  | 480     |
| Sbjct | 1273794 | AACCTGCCCGGCAACGTAGCCACGTCGTCAAACCTGCATCTCGCCGTTGCTGGTATCGGT  | 1273735 |
| Query | 481     | AAAGCCGGTCGTCAGCCCGTCACGCCCGCTGCCGTTGCCATGGTGATGGTGAAGTCGGT   | 540     |
| Sbjct | 1273734 | AAAGCCGGTCGTCAGCCCGTCACGCCCGCTGCCGTTGCCATGGTGATGGTGAAGTCGGT   | 1273675 |
| Query | 541     | ATTGCCGATCGCTATGCCGTTAAGGGCGTTGCGCGAATGGATGTTATCTTAACCTGTTC   | 600     |
| Sbjct | 1273674 | ATTGCCGATCGCTATGCCGTTAAGGGCGTTGCGCGAATGGATGTTATCTTAACCTGTTC   | 1273615 |
| Query | 601     | ACCCACTTTGGCGTCGGCGTTTTTGATCACCGGGTCGTCGTTGAAGTAGACGTCAGCAC   | 660     |
| Sbjct | 1273614 | ACCCACTTTGGCGTCGGCGTTTTTGATCACCGGGTCGTCGTTGAAGTAGACGTCAGCAC   | 1273555 |
| Query | 661     | CGCCACCATTTCATTGGCCGAGCAGGTCAGGTAGTTGGGCGTATCGGTAATTTGCCGCT   | 720     |
| Sbjct | 1273554 | CGCCACCATTTCATTGGCCGAGCAGGTCAGGTAGTTGGGCGTATCGGTAATTTGCCGCT   | 1273495 |
| Query | 721     | ATCGCCGTTTTTCGAGGTTGACGTGTACCGTCCCGGAGGCGTCGCTGTCGGCGGCGATGAA | 780     |
| Sbjct | 1273494 | ATCGCCGTTTTTCGAGGTTGACGTGTACCGTCCCGGAGGCGTCGCTGTCGGCGGCGATGAA | 1273435 |
| Query | 781     | ATAATCTTCA                                                    | 790     |
| Sbjct | 1273434 | ATAATCTTCA                                                    | 1273425 |

## Salmonella enterica strain FDAARGOS\_70 chromosome, complete genome

Sequence ID: **CP026052.1** Length: 4679420 Number of Matches: 1

Range 1: 370146 to 370935

| Score          | Expect | Identities    | Gaps      | Strand     | Frame |
|----------------|--------|---------------|-----------|------------|-------|
| 1459 bits(790) | 0.0()  | 790/790(100%) | 0/790(0%) | Plus/Minus |       |

## Features:

|       |        |                                                              |        |
|-------|--------|--------------------------------------------------------------|--------|
| Query | 1      | AATGCTGTGAATCTTGCCGCCGCTGTTGGCGTTATACAGCGCCTCAAGCTGGTCGATGCG | 60     |
| Sbjct | 370935 | AATGCTGTGAATCTTGCCGCCGCTGTTGGCGTTATACAGCGCCTCAAGCTGGTCGATGCG | 370876 |
| Query | 61     | CGGCAGGCGGTTGCGCCGCGAGCCGCCCGCATCCGGGTTGCCACCGCGTCGCTATGGGC  | 120    |
| Sbjct | 370875 | CGGCAGGCGGTTGCGCCGCGAGCCGCCCGCATCCGGGTTGCCACCGCGTCGCTATGGGC  | 370816 |
| Query | 121    | CACGCGCGCCAGGTCTCATTGCTCTCGTCTGGGTACGCAGCGGGTTGCTCACTTCACC   | 180    |
| Sbjct | 370815 | CACGCGCGCCAGGTCTCATTGCTCTCGTCTGGGTACGCAGCGGGTTGCTCACTTCACC   | 370756 |
| Query | 181    | CGCCAGTTTGGGCCGCTCAAAAGTCCAGTCGCCACGGTAATCGTGTGGCCATATGGCC   | 240    |
| Sbjct | 370755 | CGCCAGTTTGGGCCGCTCAAAAGTCCAGTCGCCACGGTAATCGTGTGGCCATATGGCC   | 370696 |
| Query | 241    | CCACATTTTGGCTTTTGCCGTATCCGGGCTGGTCGCGACGGTAAACTTCACGCTGCGGGA | 300    |
| Sbjct | 370695 | CCACATTTTGGCTTTTGCCGTATCCGGGCTGGTCGCGACGGTAAACTTCACGCTGCGGGA | 370636 |
| Query | 301    | AACCGGCGTATTGATGTATGAATTGACGGGCACGATGCTTAACGGCGTCAGCAGCCCCAC | 360    |
| Sbjct | 370635 | AACCGGCGTATTGATGTATGAATTGACGGGCACGATGCTTAACGGCGTCAGCAGCCCCAC | 370576 |
| Query | 361    | GCCCTTTTCTGGGTGAGGATAATGGTCGCATCGCCGTTAGCGTCGGTGATCCCGTGATA  | 420    |
| Sbjct | 370575 | GCCCTTTTCTGGGTGAGGATAATGGTCGCATCGCCGTTAGCGTCGGTGATCCCGTGATA  | 370516 |
| Query | 421    | AACCTGCCCGGCAACGTAGCCACGTCGTCAAACCTGCATCTCGCCGTTGCTGGTATCGGT | 480    |
| Sbjct | 370515 | AACCTGCCCGGCAACGTAGCCACGTCGTCAAACCTGCATCTCGCCGTTGCTGGTATCGGT | 370456 |
| Query | 481    | AAAGCCGGTCGTCAGCCCGTCACGCCCGCTGCCGTTGCCATGGTGATGGTGAAGTCGGT  | 540    |
| Sbjct | 370455 | AAAGCCGGTCGTCAGCCCGTCACGCCCGCTGCCGTTGCCATGGTGATGGTGAAGTCGGT  | 370396 |
| Query | 541    | ATTGCCGATCGCTATGCCGTTAAGGGCGTTGCGCGAATGGATGTTATCTTAACCTGTTC  | 600    |
| ..... |        |                                                              |        |

|       |        |                                                                |        |
|-------|--------|----------------------------------------------------------------|--------|
| Sbjct | 370395 | ATTGCCGATCGCTATGCCGTTAAGGGCGTTGCGCGAATGGATGTTTCATCTTAACCTGTTTC | 370336 |
| Query | 601    | ACCCACTTTGGCGTCGGCGTTTTTGTATCACCAGGGTCGTCGTTGAAGTAGACGTCCAGCAC | 660    |
| Sbjct | 370335 | ACCCACTTTGGCGTCGGCGTTTTTGTATCACCAGGGTCGTCGTTGAAGTAGACGTCCAGCAC | 370276 |
| Query | 661    | CGCCACCATTTTCATTGGCCGAGCAGGTCAGGTAGTTGGGCGTATCGGTAAATTTGCCGCT  | 720    |
| Sbjct | 370275 | CGCCACCATTTTCATTGGCCGAGCAGGTCAGGTAGTTGGGCGTATCGGTAAATTTGCCGCT  | 370216 |
| Query | 721    | ATCGCCGTTTTTCGAGGTTGACGTGTACCGTCCCGGAGGCGTCGCTGTCGGCGGCGATGAA  | 780    |
| Sbjct | 370215 | ATCGCCGTTTTTCGAGGTTGACGTGTACCGTCCCGGAGGCGTCGCTGTCGGCGGCGATGAA  | 370156 |
| Query | 781    | ATAATCTTCA                                                     | 790    |
| Sbjct | 370155 | ATAATCTTCA                                                     | 370146 |

Salmonella enterica subsp. enterica serovar Typhimurium strain FORC50 chromosome, complete genome  
Sequence ID: **CP019383.1** Length: 4673894 Number of Matches: 1  
Range 1: 1273445 to 1274234

| Score          | Expect  | Identities                                                     | Gaps      | Strand     | Frame   |
|----------------|---------|----------------------------------------------------------------|-----------|------------|---------|
| 1459 bits(790) | 0.0()   | 790/790(100%)                                                  | 0/790(0%) | Plus/Minus |         |
| Features:      |         |                                                                |           |            |         |
| Query          | 1       | AATGCTGTGAATCTTGCCGCCGCTGTTGGCGTTATACAGCGCTCAAGCTGGTCGATGCG    |           |            | 60      |
| Sbjct          | 1274234 | AATGCTGTGAATCTTGCCGCCGCTGTTGGCGTTATACAGCGCTCAAGCTGGTCGATGCG    |           |            | 1274175 |
| Query          | 61      | CGGCAGGCGGTTCCGCCGCGAGCCGCCGATCCGGGTTGCCACCGCGTCGCTATGGGC      |           |            | 120     |
| Sbjct          | 1274174 | CGGCAGGCGGTTCCGCCGCGAGCCGCCGATCCGGGTTGCCACCGCGTCGCTATGGGC      |           |            | 1274115 |
| Query          | 121     | CACGCGCGCCAGGTCTCATTGCTCTCGTCTGGGTACGACGCGGTTGCTCACTTCACC      |           |            | 180     |
| Sbjct          | 1274114 | CACGCGCGCCAGGTCTCATTGCTCTCGTCTGGGTACGACGCGGTTGCTCACTTCACC      |           |            | 1274055 |
| Query          | 181     | CGCCAGTTTGGGCCGCTCAAAAGTCCAGTCGCCACGGTAATCGTGTGGCCATATGGCC     |           |            | 240     |
| Sbjct          | 1274054 | CGCCAGTTTGGGCCGCTCAAAAGTCCAGTCGCCACGGTAATCGTGTGGCCATATGGCC     |           |            | 1273995 |
| Query          | 241     | CCACATTTTGGCTTTTGCCGTATCCGGGCTGGTCGCGACGGTAAACTTCACGCTGCGGGA   |           |            | 300     |
| Sbjct          | 1273994 | CCACATTTTGGCTTTTGCCGTATCCGGGCTGGTCGCGACGGTAAACTTCACGCTGCGGGA   |           |            | 1273935 |
| Query          | 301     | AACCGGCGTATTGATGTATGAATTGACGGGCACGATGCTTAACGGCGTCAGCAGCCCCAC   |           |            | 360     |
| Sbjct          | 1273934 | AACCGGCGTATTGATGTATGAATTGACGGGCACGATGCTTAACGGCGTCAGCAGCCCCAC   |           |            | 1273875 |
| Query          | 361     | GCCCTTTTCTGGGTGAGGATAATGGTCGCATCGCCGTTAGCGTCGGTGATCCCGTGATA    |           |            | 420     |
| Sbjct          | 1273874 | GCCCTTTTCTGGGTGAGGATAATGGTCGCATCGCCGTTAGCGTCGGTGATCCCGTGATA    |           |            | 1273815 |
| Query          | 421     | AACCTGCCCGGCAACGTAGCCACGTCGTCAAACCTGCATCTCGCCGTTGCTGGTATCGGT   |           |            | 480     |
| Sbjct          | 1273814 | AACCTGCCCGGCAACGTAGCCACGTCGTCAAACCTGCATCTCGCCGTTGCTGGTATCGGT   |           |            | 1273755 |
| Query          | 481     | AAAGCCGGTCGTCAGCCCGTCACGCCCGCTGCCGTTGCCATGGTGATGGTGAAGTCGGT    |           |            | 540     |
| Sbjct          | 1273754 | AAAGCCGGTCGTCAGCCCGTCACGCCCGCTGCCGTTGCCATGGTGATGGTGAAGTCGGT    |           |            | 1273695 |
| Query          | 541     | ATTGCCGATCGCTATGCCGTTAAGGGCGTTGCGCGAATGGATGTTTCATCTTAACCTGTTTC |           |            | 600     |
| Sbjct          | 1273694 | ATTGCCGATCGCTATGCCGTTAAGGGCGTTGCGCGAATGGATGTTTCATCTTAACCTGTTTC |           |            | 1273635 |
| Query          | 601     | ACCCACTTTGGCGTCGGCGTTTTTGTATCACCAGGGTCGTCGTTGAAGTAGACGTCCAGCAC |           |            | 660     |
| Sbjct          | 1273634 | ACCCACTTTGGCGTCGGCGTTTTTGTATCACCAGGGTCGTCGTTGAAGTAGACGTCCAGCAC |           |            | 1273575 |
| Query          | 661     | CGCCACCATTTTCATTGGCCGAGCAGGTCAGGTAGTTGGGCGTATCGGTAAATTTGCCGCT  |           |            | 720     |
| Sbjct          | 1273574 | CGCCACCATTTTCATTGGCCGAGCAGGTCAGGTAGTTGGGCGTATCGGTAAATTTGCCGCT  |           |            | 1273515 |
| Query          | 721     | ATCGCCGTTTTTCGAGGTTGACGTGTACCGTCCCGGAGGCGTCGCTGTCGGCGGCGATGAA  |           |            | 780     |
| Sbjct          | 1273514 | ATCGCCGTTTTTCGAGGTTGACGTGTACCGTCCCGGAGGCGTCGCTGTCGGCGGCGATGAA  |           |            | 1273455 |
| Query          | 781     | ATAATCTTCA                                                     |           |            | 790     |
| Sbjct          | 1273454 | ATAATCTTCA                                                     |           |            | 1273445 |

Salmonella enterica subsp. enterica serovar Enteritidis strain SJTUF10984 chromosome, complete genome  
Sequence ID: **CP015526.1** Length: 4679791 Number of Matches: 1  
Range 1: 2578966 to 2579755

| Score          | Expect  | Identities                                                  | Gaps      | Strand    | Frame   |
|----------------|---------|-------------------------------------------------------------|-----------|-----------|---------|
| 1459 bits(790) | 0.0()   | 790/790(100%)                                               | 0/790(0%) | Plus/Plus |         |
| Features:      |         |                                                             |           |           |         |
| Query          | 1       | AATGCTGTGAATCTTGCCGCCGCTGTTGGCGTTATACAGCGCTCAAGCTGGTCGATGCG |           |           | 60      |
| Sbjct          | 2578966 | AATGCTGTGAATCTTGCCGCCGCTGTTGGCGTTATACAGCGCTCAAGCTGGTCGATGCG |           |           | 2579025 |

|       |         |                                                               |         |
|-------|---------|---------------------------------------------------------------|---------|
| Query | 61      | CGGCAGGCGGTTCCGCCGCGAGCCGCCGCATCCGGGTTGCCACCGCGTCGCTATGGGC    | 120     |
| Sbjct | 2579026 | CGGCAGGCGGTTCCGCCGCGAGCCGCCGCATCCGGGTTGCCACCGCGTCGCTATGGGC    | 2579085 |
| Query | 121     | CACGCGCGCCAGGTCTCATTGCTCTCGTCCTGGGTACGCAGCGGGTTGCTCACTTCACC   | 180     |
| Sbjct | 2579086 | CACGCGCGCCAGGTCTCATTGCTCTCGTCCTGGGTACGCAGCGGGTTGCTCACTTCACC   | 2579145 |
| Query | 181     | CGCCAGTTTGGGCCGCTCAAAAGTCCAGTCGCCACGGTAATCGTGTGGCCATATGGCC    | 240     |
| Sbjct | 2579146 | CGCCAGTTTGGGCCGCTCAAAAGTCCAGTCGCCACGGTAATCGTGTGGCCATATGGCC    | 2579205 |
| Query | 241     | CCACATTTTGGCTTTTGCCGTATCCGGGCTGGTCGCGACGGTAAACTTCACGCTGCGGGA  | 300     |
| Sbjct | 2579206 | CCACATTTTGGCTTTTGCCGTATCCGGGCTGGTCGCGACGGTAAACTTCACGCTGCGGGA  | 2579265 |
| Query | 301     | AACCGGCGTATTGATGTATGAATTGACGGGCACGATGCTTAACGGCGTCAGCAGCCCCAC  | 360     |
| Sbjct | 2579266 | AACCGGCGTATTGATGTATGAATTGACGGGCACGATGCTTAACGGCGTCAGCAGCCCCAC  | 2579325 |
| Query | 361     | GCCCTTTTTCTGGGTGAGGATAATGGTCGCATCGCCGTAGCGTCGGTGATCCCGTGATA   | 420     |
| Sbjct | 2579326 | GCCCTTTTTCTGGGTGAGGATAATGGTCGCATCGCCGTAGCGTCGGTGATCCCGTGATA   | 2579385 |
| Query | 421     | AACCTGCCCGGCAACGTAGCCACGTCGTCAAACCTGCATCTCGCCGTTGCTGGTATCGGT  | 480     |
| Sbjct | 2579386 | AACCTGCCCGGCAACGTAGCCACGTCGTCAAACCTGCATCTCGCCGTTGCTGGTATCGGT  | 2579445 |
| Query | 481     | AAAGCCGGTCGTCAGCCCGTCACGCCCGCTGCCGTTGCCATGGTGATGGTGAAGTCGGT   | 540     |
| Sbjct | 2579446 | AAAGCCGGTCGTCAGCCCGTCACGCCCGCTGCCGTTGCCATGGTGATGGTGAAGTCGGT   | 2579505 |
| Query | 541     | ATTGCCGATCGCTATGCCGTTAAGGGCGTTGCGCGAATGGATGTTATCTTAACCTGTTC   | 600     |
| Sbjct | 2579506 | ATTGCCGATCGCTATGCCGTTAAGGGCGTTGCGCGAATGGATGTTATCTTAACCTGTTC   | 2579565 |
| Query | 601     | ACCCACTTTGGCGTCGGCGTTTTTGATCACCAGGTCGTCGTTGAAGTAGACGTCCAGCAC  | 660     |
| Sbjct | 2579566 | ACCCACTTTGGCGTCGGCGTTTTTGATCACCAGGTCGTCGTTGAAGTAGACGTCCAGCAC  | 2579625 |
| Query | 661     | CGCCACCATTTTCATTGGCCGAGCAGGTCAGGTAGTTGGGCGTATCGGTAAATTTGCCGCT | 720     |
| Sbjct | 2579626 | CGCCACCATTTTCATTGGCCGAGCAGGTCAGGTAGTTGGGCGTATCGGTAAATTTGCCGCT | 2579685 |
| Query | 721     | ATCGCCGTTTTTCGAGGTTGACGTGTACCGTCCCGGAGGCGTCGCTGTCGGCGGCGATGAA | 780     |
| Sbjct | 2579686 | ATCGCCGTTTTTCGAGGTTGACGTGTACCGTCCCGGAGGCGTCGCTGTCGGCGGCGATGAA | 2579745 |
| Query | 781     | ATAATCTTCA                                                    | 790     |
| Sbjct | 2579746 | ATAATCTTCA                                                    | 2579755 |

Salmonella enterica subsp. enterica serovar Enteritidis strain SJTUF10978 chromosome, complete genome

Sequence ID: **CP015524.1** Length: 4679990 Number of Matches: 1

Range 1: 2579178 to 2579967

| Score          | Expect  | Identities                                                   | Gaps      | Strand    | Frame   |
|----------------|---------|--------------------------------------------------------------|-----------|-----------|---------|
| 1459 bits(790) | 0.0()   | 790/790(100%)                                                | 0/790(0%) | Plus/Plus |         |
| Features:      |         |                                                              |           |           |         |
| Query          | 1       | AATGCTGTGAATCTTGCCGCCGCTGTTGGCGTTATACAGCGCCTCAAGCTGGTCGATGCG |           |           | 60      |
| Sbjct          | 2579178 | AATGCTGTGAATCTTGCCGCCGCTGTTGGCGTTATACAGCGCCTCAAGCTGGTCGATGCG |           |           | 2579237 |
| Query          | 61      | CGGCAGGCGGTTCCGCCGCGAGCCGCCGCATCCGGGTTGCCACCGCGTCGCTATGGGC   |           |           | 120     |
| Sbjct          | 2579238 | CGGCAGGCGGTTCCGCCGCGAGCCGCCGCATCCGGGTTGCCACCGCGTCGCTATGGGC   |           |           | 2579297 |
| Query          | 121     | CACGCGCGCCAGGTCTCATTGCTCTCGTCCTGGGTACGCAGCGGGTTGCTCACTTCACC  |           |           | 180     |
| Sbjct          | 2579298 | CACGCGCGCCAGGTCTCATTGCTCTCGTCCTGGGTACGCAGCGGGTTGCTCACTTCACC  |           |           | 2579357 |
| Query          | 181     | CGCCAGTTTGGGCCGCTCAAAAGTCCAGTCGCCACGGTAATCGTGTGGCCATATGGCC   |           |           | 240     |
| Sbjct          | 2579358 | CGCCAGTTTGGGCCGCTCAAAAGTCCAGTCGCCACGGTAATCGTGTGGCCATATGGCC   |           |           | 2579417 |
| Query          | 241     | CCACATTTTGGCTTTTGCCGTATCCGGGCTGGTCGCGACGGTAAACTTCACGCTGCGGGA |           |           | 300     |
| Sbjct          | 2579418 | CCACATTTTGGCTTTTGCCGTATCCGGGCTGGTCGCGACGGTAAACTTCACGCTGCGGGA |           |           | 2579477 |
| Query          | 301     | AACCGGCGTATTGATGTATGAATTGACGGGCACGATGCTTAACGGCGTCAGCAGCCCCAC |           |           | 360     |
| Sbjct          | 2579478 | AACCGGCGTATTGATGTATGAATTGACGGGCACGATGCTTAACGGCGTCAGCAGCCCCAC |           |           | 2579537 |
| Query          | 361     | GCCCTTTTTCTGGGTGAGGATAATGGTCGCATCGCCGTAGCGTCGGTGATCCCGTGATA  |           |           | 420     |
| Sbjct          | 2579538 | GCCCTTTTTCTGGGTGAGGATAATGGTCGCATCGCCGTAGCGTCGGTGATCCCGTGATA  |           |           | 2579597 |
| Query          | 421     | AACCTGCCCGGCAACGTAGCCACGTCGTCAAACCTGCATCTCGCCGTTGCTGGTATCGGT |           |           | 480     |
| Sbjct          | 2579598 | AACCTGCCCGGCAACGTAGCCACGTCGTCAAACCTGCATCTCGCCGTTGCTGGTATCGGT |           |           | 2579657 |
| Query          | 481     | AAAGCCGGTCGTCAGCCCGTCACGCCCGCTGCCGTTGCCATGGTGATGGTGAAGTCGGT  |           |           | 540     |
| Sbjct          | 2579658 | AAAGCCGGTCGTCAGCCCGTCACGCCCGCTGCCGTTGCCATGGTGATGGTGAAGTCGGT  |           |           | 2579717 |
| Query          | 541     | ATTGCCGATCGCTATGCCGTTAAGGGCGTTGCGCGAATGGATGTTATCTTAACCTGTTC  |           |           | 600     |
| Sbjct          | 2579718 | ATTGCCGATCGCTATGCCGTTAAGGGCGTTGCGCGAATGGATGTTATCTTAACCTGTTC  |           |           | 2579777 |
| Query          | 601     | ACCCACTTTGGCGTCGGCGTTTTTGATCACCAGGTCGTCGTTGAAGTAGACGTCCAGCAC |           |           | 660     |
| Sbjct          | 2579778 | ACCCACTTTGGCGTCGGCGTTTTTGATCACCAGGTCGTCGTTGAAGTAGACGTCCAGCAC |           |           | 2579837 |

**Supplementary FIGURE S2 | BLAST search results using *Salmonella* Gallinarum *ratA* *ROD* nucleotide sequence (GenBank accession no. AM933173.1 segment 2636413-2636983) against the nucleotide collection (nr/nt) database.** The maximum number of aligned sequences to display was set to the maximum value of 20,000, and the other parameters were set to default values. The results showed that *ratA ROD* fragment exists only in *S. Gallinarum* and other *Salmonella* serovars, which could be exploited to distinguish *S. Pullorum* from them.
